# Supplementary material for: Dissecting cell-type-specific metabolism in pancreatic ductal adenocarcinoma
Source: eLife journal article supplement (doi:10.7554/elife.56782), 2020-07-10
Supplement: supp [file elife-56782-supp-v1.zip]

Archive with 22 entries (22 files):
- elife_poa_e56782_Transparent_Reporting_File.pdf
- elife_poa_e56782_Supplementary_file_1.xlsx
- elife_poa_e56782_Figure_1_figure_supplement_1.pdf
- elife_poa_e56782_Figure_1_figure_supplement_2.pdf
- elife_poa_e56782_Figure_1_figure_supplement_3.pdf
- elife_poa_e56782_Figure_2_figure_supplement_1.pdf
- elife_poa_e56782_Figure_3_figure_supplement_1.pdf
- elife_poa_e56782_Figure_4_figure_supplement_1.pdf
- elife_poa_e56782_Figure_5_figure_supplement_1.pdf
- elife_poa_e56782_Figure_6_figure_supplement_1.pdf
- elife_poa_e56782_Figure_6_figure_supplement_2.pdf
- elife_poa_e56782_Figure_7_figure_supplement_1.pdf
- elife_poa_e56782_Figure_7_figure_supplement_2.pdf
- elife_poa_e56782_Figure_1_source_data_1.xlsx
- elife_poa_e56782_Figure_1_figure_supplement_1_source_data_1.xlsx
- elife_poa_e56782_Figure_1_figure_supplement_2_source_data_1.xlsx
- elife_poa_e56782_Figure_1_figure_supplement_3_source_data_1.xlsx
- elife_poa_e56782_Figure_2_source_data_1.xlsx
- elife_poa_e56782_Figure_3_source_data_1.xlsx
- elife_poa_e56782_Figure_4_source_data_1.xlsx
- elife_poa_e56782_Figure_4_figure_supplement_1_source_data_1.xlsx
- elife_poa_e56782_Figure_5_source_data_1.xlsx
