# Supplementary material for: Dissecting cell-type-specific metabolism in pancreatic ductal adenocarcinoma
Source: eLife journal article supplement (doi:10.7554/elife.56782), 2020-07-10
Supplement: supp [file elife-56782-supp-v1.zip › elife_poa_e56782_Figure_1_figure_supplement_1_source_data_1.xlsx]

## Sheet: Fig S1 Low rate infusion levels
Metabolite	Pancreas 1	Pancreas 2	Pancreas 3	KP-/-C 1	KP-/-C 2	KP-/-C 3	KPC 1	KPC 2	KPC 3
a-KG	0.917783	0.844043	1.23817	0.904291	0.231876	0.54333	0.804048	0.541758	0.454557
alanine	1.09234	0.824574	1.08308	0.882759	0.625439	1.33719	0.674427	1.52105	0.887609
asparagine	0.903083	0.953222	1.14369	0.706894	0.3245	1.23155	0.651202	1.84839	1.36263
aspartate	0.934757	0.917816	1.14743	2.64531	3.87272	4.29734	3.27583	4.91479	4.83839
citrate	0.850226	0.776101	1.37367	0.141615	0.130085	0.170403	0.378593	0.51968	0.261661
fumarate	0.723115	0.510123	1.76676	0.247359	0.200733	0.954252	0.196352	0.41487	1.284
glutamate	1.05596	0.936147	1.0079	0.935107	0.922458	0.929404	0.802474	1.20815	0.856007
glutamine	0.664596	1.07988	1.25552	0.22671	0.434736	0.470954	0.744927	1.36442	0.324617
glycine	1.02899	0.966915	1.0041	0.310586	0.420594	0.516226	0.742776	1.39771	0.740499
lactate	1.01824	1.04559	0.936167	2.05518	1.8363	2.0725	1.01375	1.30495	1.95539
malate	0.878798	0.933706	1.1875	0.822327	0.694086	1.15063	1.04486	1.77877	1.32103
proline	1.00665	0.499913	0.425591	0.806581	0.539724	1.4529	1.18677	0.983994	0.765575
pyruvate	1.05862	0.978203	0.96318	2.19942	1.88385	4.76007	1.83437	1.64285	2.16744
serine	1.01431	0.957632	1.02806	0.581709	0.401545	1.01729	0.617193	1.32	1.08482
succinate	1.09091	1.00271	0.906373	1.59492	0.992734	1.63055	0.827239	1.99299	1.31925

## Sheet: Fig S1 Low rate infusion plasma
Metabolite	Label	Pancreas 1	Pancreas 2	Pancreas 3	KP-/-C 1	KP-/-C 2	KP-/-C 3	KPC 1	KPC 2	KPC 3
a-KG	M+0	0.72229	0.732346	0.705304	0.9154	1.0205	0.6258	0.7876	0.7398	0.7919
a-KG	M+1	0.129068	0.138673	0.145488	0.0284	-0.0849	0.1714	0.1534	0.111	0.1635
a-KG	M+2	0.119102	0.0976188	0.115197	0.1015	0.1008	0.169	0.0759	0.1193	0.0527
a-KG	M+3	0.0295397	0.0313623	0.0340112	-0.0444	-0.0345	0.0276	-0.0072	0.0237	0.0023
a-KG	M+4	0	0	0	-0.0038	-0.0044	0.0088	-0.0115	0.0143	-0.0115
a-KG	M+5	0	0	0	0.0031	0.0025	-0.0047	0.0011	-0.0081	0.0005
alanine	M+0	0.673559	0.586549	0.673391	0.7469	0.6207	0.6226	0.5794	0.678	0.7106
alanine	M+1	0.0609859	0.0707418	0.0563741	0.0513	0.0655	0.0782	0.074	0.0533	0.0592
alanine	M+2	0.0456507	0.0597867	0.0482415	0.0386	0.0498	0.0597	0.0661	0.0477	0.0487
alanine	M+3	0.219804	0.282923	0.221994	0.1618	0.2672	0.2399	0.284	0.2212	0.1825
asparagine	M+0	0.964285	0.968345	0.974427	1.0123	0.9895	0.9862	0.9311	1.0029	0.9294
asparagine	M+1	0.0109861	0.00147434	0.00032514	-0.0167	0.0109	0.0067	0.0202	-0.0021	0.0556
asparagine	M+2	0.0198982	0.0241133	0.0122169	0.0255	0.0209	0.0041	0.051	-0.0076	0.0064
asparagine	M+3	0.00483084	0.00606746	0.0130314	-0.017	-0.0171	0.008	-0.023	0.013	0.0054
asparagine	M+4	0	0	0	-0.0069	-0.007	-0.0085	0.0038	-0.0084	-0.0042
aspartate	M+0	0.671025	0.67462	0.680228	0.8749	0.6488	0.7126	0.7744	0.7824	0.8434
aspartate	M+1	0.142425	0.157517	0.150974	0.0563	0.1624	0.1052	0.124	0.0937	0.1114
aspartate	M+2	0.0916702	0.0752274	0.0885116	0.056	0.104	0.0729	0.0723	0.0645	0.0607
aspartate	M+3	0.0948796	0.0926348	0.0802861	0.0093	0.073	0.0684	0.0261	0.0307	-0.0062
aspartate	M+4	0	0	0	0.0101	0.0239	0.0707	0.0162	0.0506	-0.0098
citrate	M+0	0.670764	0.682813	0.674353	0.7965	0.5867	0.5434	0.5842	0.7056	0.6546
citrate	M+1	0.168603	0.167582	0.16833	0.1157	0.1875	0.2307	0.1884	0.1369	0.1693
citrate	M+2	0.0987046	0.0862713	0.090665	0.0487	0.1182	0.1205	0.1252	0.0865	0.1061
citrate	M+3	0.046396	0.0472583	0.0489812	0.0341	0.0802	0.0756	0.0752	0.0509	0.0502
citrate	M+4	0.0121623	0.0131241	0.0127093	0.0068	0.0164	0.0283	0.0207	0.0191	0.0192
citrate	M+5	0.0026749	0.00225998	0.00398509	0.0005	0.0123	0.002	0.007	0.0012	0.0005
citrate	M+6	0.000695374	0.000691829	0.000977155	-0.0016	0.0028	0.0028	0.0015	0.0029	0.0018
fumarate	M+0	0.762817	0.829788	0.856248	0.9835	0.9659	0.9673	0.9749	0.9713	0.9565
fumarate	M+1	0.0791767	0.0550858	0.0306449	0.0089	0.0235	0.014	0.0144	0.0175	0.0237
fumarate	M+2	0.0382402	0.0188375	0.00546884	0.0048	0.0061	0.0126	0.0067	0.0067	0.0128
fumarate	M+3	0.034334	0.0222434	0.0554654	0.0019	0.0039	0.0044	0.0016	0.0035	0.0013
fumarate	M+4	0.0854324	0.0740457	0.0521729	0.0014	0.001	0.0028	0.0032	0.0021	0.0069
glutamate	M+0	0.639239	0.701625	0.702011	0.8816	0.5979	0.661	0.746	0.8025	0.784
glutamate	M+1	0.1223	0.120436	0.126627	0.0556	0.1448	0.1337	0.1048	0.0706	0.0993
glutamate	M+2	0.131048	0.110387	0.107412	0.0491	0.1468	0.1399	0.1066	0.0958	0.0897
glutamate	M+3	0.0661715	0.0453009	0.0503622	0.017	0.0716	0.0548	0.037	0.0309	0.0292
glutamate	M+4	0.0238565	0.0147784	0.00782544	-0.0022	0.0294	0.0054	0.0035	-0.0008	-0.0006
glutamate	M+5	0.0173846	0.00747314	0.0057622	-0.0005	0.0123	0.0092	0.0045	0.0041	0.0004
glutamine	M+0	0.723239	0.716138	0.732965	0.8641	0.6679	0.6612	0.697	0.8197	0.7547
glutamine	M+1	0.137161	0.142136	0.128759	0.0732	0.1508	0.1522	0.1429	0.0853	0.1261
glutamine	M+2	0.0955677	0.0945332	0.0902455	0.0488	0.1135	0.1197	0.1049	0.0675	0.0863
glutamine	M+3	0.0352162	0.0407069	0.0395836	0.0153	0.0546	0.0496	0.0451	0.0216	0.0308
glutamine	M+4	0.00759467	0.00449502	0.00716134	0.0016	0.0119	0.0142	0.0081	0.0047	0.0004
glutamine	M+5	0.00122064	0.00199024	0.00128509	-0.0026	0.0028	0.0034	0.0013	0.0014	0.0025
glycine	M+0	0.97308	0.969187	0.972615	0.9954	0.981	0.977	0.9757	0.9874	0.9811
glycine	M+1	0.0139088	0.0147339	0.0141072	-0.0005	0.0034	0.0095	0.012	0.0048	0.0061
glycine	M+2	0.0130112	0.0160795	0.0132778	0.0052	0.0156	0.0128	0.0123	0.0063	0.0127
lactate	M+0	0.712603	0.580178	0.608122	0.6918	0.6258	0.5539	0.5599	0.7675	0.7017
lactate	M+1	0.0550432	0.0654368	0.0673701	0.0558	0.049	0.0787	0.0701	0.035	0.0619
lactate	M+2	0.0409066	0.0574744	0.054616	0.048	0.0439	0.0627	0.0648	0.0314	0.0486
lactate	M+3	0.191448	0.296911	0.269892	0.2042	0.2809	0.3046	0.3051	0.1664	0.1878
malate	M+0	0.723139	0.721624	0.746394	0.8124	0.6054	0.6339	0.5037	0.7049	0.676
malate	M+1	0.141751	0.132429	0.13231	0.0778	0.1768	0.17	0.1264	0.1112	0.1196
malate	M+2	0.0785705	0.0894776	0.0795641	0.0567	0.1294	0.1069	0.0925	0.1188	0.0956
malate	M+3	0.0560298	0.056469	0.032201	0.0697	0.068	0.0839	0.2697	0.0554	0.0874
malate	M+4	0.000509322	0	0.00953025	-0.0059	0.0132	0.0055	-0.0063	0.0083	0.0056
proline	M+0	0.944675	0.921966	0.93966	0.9932	0.9464	0.9821	0.9722	1.0065	0.9829
proline	M+1	0.0303322	0.0530566	0.0383126	-0.0051	0.0024	-0.0117	-0.01	-0.0258	-0.0092
proline	M+2	0.0188993	0.0173945	0.0162335	0.0119	0.0401	0.0201	0.0278	0.0159	0.022
proline	M+3	0.00589077	0.0065879	0.00477174	0.0026	0.0099	0.0084	0.0041	0.0041	0.0041
proline	M+4	0.00020276	0.000994893	0.000856588	-0.005	0	-0.0004	-0.0043	-0.0042	-0.0032
proline	M+5	0	0	0.0001658	0.0004	-0.002	-0.001	-0.0002	0	-0.0004
serine	M+0	0.945113	0.934999	0.939809	0.9795	0.9227	0.9479	0.9339	0.9674	0.9633
serine	M+1	0.0219353	0.0323583	0.031536	-0.0041	0.0217	0.0244	0.0331	0.0083	0.0177
serine	M+2	0.0174857	0.0160248	0.0159082	0.0133	0.0203	0.0145	0.0203	0.0142	0.0137
serine	M+3	0.015466	0.0166179	0.0127468	0.0168	0.0403	0.0144	0.0157	0.0129	0.0094
succinate	M+0	0.762562	0.782831	0.835297	0.8987	0.6905	0.6859	0.766	0.8258	0.8372
succinate	M+1	0.128049	0.105039	0.0917206	0.0638	0.1564	0.171	0.1275	0.0878	0.0989
succinate	M+2	0.0783683	0.0780297	0.0470898	0.0309	0.1013	0.1	0.0729	0.0651	0.0452
succinate	M+3	0.0258885	0.0277693	0.0211635	0.007	0.0416	0.033	0.0338	0.0168	0.0116
succinate	M+4	0.00513298	0.0063319	0.00472887	0.0013	0.0104	0.0117	0.0022	0.0053	0.0025
