# Supplementary material for: Dissecting cell-type-specific metabolism in pancreatic ductal adenocarcinoma
Source: eLife journal article supplement (doi:10.7554/elife.56782), 2020-07-10
Supplement: supp [file elife-56782-supp-v1.zip › elife_poa_e56782_Figure_1_figure_supplement_2_source_data_1.xlsx]

## Sheet: Fig1 S2 High rate infusion
Metabolite	Label	Pancreas 1	Pancreas 2	Pancreas 3	KP-/-C 1	KP-/-C 2	KP-/-C 3	KP-/-C 4
a-KG	M+0	0.7815	0.6917	0.7156	0.4512	0.5713	0.6135	0.5746
a-KG	M+1	0.1626	0.1732	0.1452	0.1599	0.1644	0.1627	0.1438
a-KG	M+2	0.0554	0.0867	0.087	0.2231	0.1703	0.1519	0.1707
a-KG	M+3	0.0141	0.0376	0.0343	0.0979	0.0635	0.0456	0.0653
a-KG	M+4	-0.0144	0.0054	0.0076	0.055	0.022	0.0228	0.0348
a-KG	M+5	0	0.0082	0.0101	0.0187	0.0091	0.0039	0.0098
alanine	M+0	0.5987	0.5532	0.6189	0.5073	0.6055	0.7081	0.5598
alanine	M+1	0.0619	0.0963	0.0778	0.0765	0.0827	0.0698	0.0769
alanine	M+2	0.0508	0.0629	0.0488	0.0722	0.0618	0.0449	0.0653
alanine	M+3	0.2908	0.2877	0.2559	0.3455	0.2511	0.1783	0.2988
asparagine	M+0	0.8587	0.7625	0.8349	0.948	0.9045	0.9706	0.953
asparagine	M+1	0.0992	0.1558	0.1079	0.0201	0.0599	0.0164	0.0349
asparagine	M+2	0.0233	0.0508	0.029	0.0102	0.0151	0.0006	-0.0011
asparagine	M+3	0.0203	0.0257	0.0229	0.0166	0.0157	0.0098	0.01
asparagine	M+4	-0.0001	0.0025	0.0042	0.0032	0.0021	0.0011	0.0016
aspartate	M+0	0.7585	0.6739	0.7407	0.5097	0.601	0.6621	0.65
aspartate	M+1	0.1243	0.1843	0.1353	0.183	0.1788	0.1664	0.1503
aspartate	M+2	0.0839	0.0857	0.0788	0.1949	0.1546	0.1292	0.1366
aspartate	M+3	0.0246	0.0403	0.0325	0.079	0.0466	0.0309	0.0462
aspartate	M+4	0.0088	0.0155	0.0125	0.034	0.0189	0.0112	0.0165
citrate	M+0	0.8058	0.7769	0.7428	0.4884	0.6099	0.554	0.5748
citrate	M+1	0.1464	0.174	0.2051	0.197	0.219	0.2477	0.2111
citrate	M+2	0.0242	0.0191	0.0155	0.1318	0.0844	0.1027	0.1018
citrate	M+3	0.0201	0.0234	0.0271	0.1001	0.0525	0.0606	0.0631
citrate	M+4	0.0027	0.0053	0.0094	0.0578	0.0301	0.0303	0.0395
citrate	M+5	0.0005	-0.0002	-0.0011	0.0134	-0.0001	-0.0002	0.0028
citrate	M+6	0.0007	0.001	0.0011	0.0122	0.0038	0.0036	0.0058
fumarate	M+0	0.8348	0.8194	0.7914	0.6078	0.6409	0.7032	0.6427
fumarate	M+1	0.1121	0.1047	0.1217	0.1583	0.1767	0.1539	0.1646
fumarate	M+2	0.041	0.0434	0.0482	0.1314	0.1108	0.0871	0.1088
fumarate	M+3	0.0048	0.0182	0.0203	0.0691	0.0503	0.0319	0.0632
fumarate	M+4	0.0112	0.0139	0.0178	0.0327	0.0201	0.017	0.0203
glutamate	M+0	0.7474	0.674	0.7055	0.4297	0.5408	0.5866	0.5502
glutamate	M+1	0.1287	0.1695	0.1545	0.1553	0.1739	0.1712	0.1544
glutamate	M+2	0.0785	0.0997	0.0858	0.2178	0.1602	0.1496	0.1681
glutamate	M+3	0.0331	0.0439	0.0422	0.1263	0.0908	0.0705	0.0898
glutamate	M+4	0.0074	0.0076	0.0066	0.0472	0.0222	0.0149	0.0252
glutamate	M+5	0.0051	0.0054	0.0054	0.0243	0.0122	0.0071	0.0123
glutamine	M+0	0.7183	0.6586	0.6667	0.5581	0.6212	0.6764	0.6746
glutamine	M+1	0.1309	0.1585	0.1509	0.1544	0.1606	0.151	0.1402
glutamine	M+2	0.0871	0.109	0.1111	0.166	0.1393	0.1174	0.1268
glutamine	M+3	0.0478	0.0513	0.0451	0.0773	0.0524	0.0351	0.0385
glutamine	M+4	0.0113	0.0162	0.0194	0.0337	0.0208	0.0162	0.0159
glutamine	M+5	0.0049	0.0058	0.006	0.0094	0.0052	0.0032	0.0037
glycine	M+0	0.9644	0.9421	0.9496	0.946	0.9381	0.9562	0.9439
glycine	M+1	0.015	0.0351	0.0259	0.021	0.0262	0.0197	0.0257
glycine	M+2	0.0207	0.0243	0.0255	0.0337	0.037	0.0252	0.0317
lactate	M+0	0.5969	0.5718	0.6384	0.5349	0.5865	0.6198	0.4343
lactate	M+1	0.0547	0.0809	0.0697	0.0679	0.0813	0.0654	0.0744
lactate	M+2	0.0494	0.0577	0.0499	0.0661	0.067	0.0488	0.0748
lactate	M+3	0.2985	0.2894	0.241	0.3282	0.2633	0.2642	0.4105
malate	M+0	0.7446	0.6525	0.7135	0.4947	0.58	0.6357	0.6029
malate	M+1	0.1478	0.2162	0.1778	0.216	0.2244	0.2061	0.1987
malate	M+2	0.065	0.0719	0.0544	0.1617	0.1161	0.097	0.1096
malate	M+3	0.0328	0.0436	0.0414	0.0948	0.0611	0.0489	0.0692
malate	M+4	0.0106	0.0142	0.0114	0.0333	0.0188	0.0123	0.0204
proline	M+0	0.8813	0.8485	0.8735	0.8474	0.8465	0.8901	0.8746
proline	M+1	0.0528	0.0668	0.049	0.017	0.0434	0.0129	0.0394
proline	M+2	0.0416	0.0483	0.0395	0.0573	0.0512	0.0398	0.042
proline	M+3	0.0156	0.0182	0.0175	0.0271	0.0238	0.0146	0.018
proline	M+4	0.0025	0.0036	0.0037	0.0142	0.0102	0.0075	0.0076
proline	M+5	0.0006	0.0025	0.0015	0.0071	0.0042	0.003	0.0036
pyruvate	M+0	0.5155	0.653	0.7402	0.5974	0.6372	0.7385	0.5007
pyruvate	M+1	0.3386	0.0832	0.064	0.0665	0.0726	0.0454	0.0697
pyruvate	M+2	0.041	0.0444	0.0392	0.0562	0.0568	0.0325	0.063
pyruvate	M+3	0.1098	0.2166	0.1566	0.2806	0.2341	0.1834	0.3674
serine	M+0	0.8879	0.853	0.8733	0.8928	0.8885	0.939	0.9031
serine	M+1	0.0564	0.0806	0.0635	0.0466	0.0483	0.0257	0.0398
serine	M+2	0.0242	0.034	0.0312	0.0296	0.0299	0.0215	0.0286
serine	M+3	0.0319	0.0328	0.0331	0.0314	0.0341	0.0142	0.0297
succinate	M+0	0.7695	0.7	0.7575	0.4811	0.5923	0.6557	0.5843
succinate	M+1	0.142	0.1809	0.1416	0.1989	0.194	0.1793	0.1735
succinate	M+2	0.0646	0.0828	0.0667	0.1927	0.1423	0.1156	0.1511
succinate	M+3	0.0162	0.0232	0.0229	0.0904	0.0506	0.0364	0.0669
succinate	M+4	0.0071	0.0096	0.0095	0.0368	0.0201	0.0119	0.0241

## Sheet: Fig1 S2 high rate infusion lvl
Metabolite	Pancreas 1	Pancreas 2	Pancreas 3	KP-/-C 1	KP-/-C 2	KP-/-C 3	KP-/-C 4
a-KG	0.231863	2.21719	0.550944	0.725695	1.84274	1.24022	4.59416
alanine	0.208123	2.28101	0.510864	0.968959	0.847884	0.802891	2.1135
asparagine	0.133494	2.42975	0.436759	0.628475	0.840551	0.96046	2.56394
aspartate	0.595229	1.9205	0.484269	4.92785	3.60853	3.77571	8.08851
citrate	0.433375	2.11969	0.446932	0.339601	0.828317	0.370477	1.23745
fumarate	0.198426	1.89187	0.909701	2.17221	3.722	2.13348	15.5817
glutamate	0.552674	1.81234	0.634982	1.54972	1.45189	1.30734	2.94134
glutamine	0.154075	2.41627	0.429656	0.61381	0.908272	0.899093	1.84532
glycine	0.346701	2.10257	0.550728	0.601012	0.850259	0.532393	1.34792
lactate	0.743683	1.79073	0.465587	5.26832	3.4927	4.17512	11.6576
malate	0.400203	1.996	0.603799	2.64913	2.89721	2.4386	7.05812
proline	0.387967	2.11398	0.498052	0.900256	1.03044	0.897364	2.31484
pyruvate	0.622355	1.87046	0.507181	2.32231	4.09337	5.35776	13.1071
serine	0.190482	2.30555	0.503971	0.665204	0.869078	0.81082	1.73748
succinate	0.705621	1.91986	0.374519	4.56015	2.35757	2.47783	8.23373
