# Supplementary material for: Dissecting cell-type-specific metabolism in pancreatic ductal adenocarcinoma
Source: eLife journal article supplement (doi:10.7554/elife.56782), 2020-07-10
Supplement: supp [file elife-56782-supp-v1.zip › elife_poa_e56782_Figure_1_figure_supplement_3_source_data_1.xlsx]

## Sheet: Fig1 S3 High rate infusion pl
Metabolite	Label	Pancreas 1	Pancreas 2	Pancreas 3	KP-/-C 1	KP-/-C 2	KP-/-C 3	KP-/-C 4
a-KG	M+0	0.671	0.6174	0.6906	0.5974	0.6861	0.7844	0.5476
a-KG	M+1	0.1417	0.1525	0.1542	0.1115	0.1639	0.1573	0.1472
a-KG	M+2	0.115	0.1595	0.1111	0.2985	0.1122	0.0604	0.1898
a-KG	M+3	0.0763	0.0951	0.0383	0.0314	0.0512	-0.0085	0.0758
a-KG	M+4	0.0048	-0.0173	0.0065	-0.0415	-0.0087	0.0098	0.0411
a-KG	M+5	-0.0091	-0.009	0.0011	0.0004	-0.0058	-0.0032	-0.0035
alanine	M+0	0.5253	0.4967	0.5918	0.4853	0.6304	0.723	0.539
alanine	M+1	0.0641	0.0771	0.0691	0.0752	0.0738	0.0593	0.0731
alanine	M+2	0.0583	0.0672	0.0513	0.0704	0.0562	0.0382	0.064
alanine	M+3	0.3523	0.3594	0.2871	0.3703	0.2393	0.1797	0.3247
asparagine	M+0	1.0152	1.0087	0.9359	0.9931	0.8995	0.9605	0.9194
asparagine	M+1	-0.0106	-0.0043	0.0391	-0.0033	0.0332	0.0197	0.0168
asparagine	M+2	-0.0264	-0.0194	0.0132	0.0538	0.0292	0.0184	0.0267
asparagine	M+3	0.0106	-0.003	-0.0008	-0.0563	0.0074	-0.0096	0.0077
asparagine	M+4	-0.0023	0.0023	0.0094	0.0124	0.0048	-0.0034	-0.0027
aspartate	M+0	0.6449	0.4949	0.6071	0.5411	0.7481	0.7611	0.7332
aspartate	M+1	0.1316	0.1475	0.1239	0.1716	0.166	0.1362	0.1343
aspartate	M+2	0.0988	0.0971	0.0759	0.1616	0.0334	0.0849	0.047
aspartate	M+3	0.0843	0.1623	0.1639	0.0941	0.0559	0.0314	0.0682
aspartate	M+4	0.0489	0.0898	0.0683	0.0446	0.0106	-0.0076	0.0368
citrate	M+0	0.62	0.5667	0.6366	0.4139	0.546	0.6522	0.5067
citrate	M+1	0.186	0.197	0.1759	0.1724	0.2208	0.1871	0.2108
citrate	M+2	0.1106	0.1312	0.1208	0.1882	0.1255	0.0976	0.138
citrate	M+3	0.0443	0.0536	0.0414	0.1182	0.0734	0.0469	0.0953
citrate	M+4	0.0246	0.0344	0.0196	0.071	0.0235	0.0145	0.0373
citrate	M+5	0.0035	0.0081	0.0045	0.0361	0.0097	0.002	0.0114
citrate	M+6	0.0018	0.002	0.0013	0.0036	0.0044	0.0013	0.0044
fumarate	M+0	0.8493	0.9067	0.8931	0.9316	0.9432	0.9436	0.951
fumarate	M+1	0.0439	0.0239	0.042	0.0281	0.0238	0.0237	0.0218
fumarate	M+2	0.0315	0.0004	0.0265	0.0227	0.0151	0.0179	0.013
fumarate	M+3	0.0157	0.0049	0.025	0.0116	0.0068	0.0056	0.0067
fumarate	M+4	0.0183	0.0208	0.0135	0.009	0.0132	0.0086	0.0099
glutamate	M+0	0.6718	0.6462	0.7087	0.4567	0.7074	0.7242	0.6543
glutamate	M+1	0.1054	0.0934	0.1053	0.1631	0.1286	0.1288	0.1267
glutamate	M+2	0.1141	0.1168	0.1103	0.2005	0.1179	0.114	0.1443
glutamate	M+3	0.0615	0.0672	0.0437	0.1127	0.0426	0.0277	0.0567
glutamate	M+4	0.027	0.0419	0.018	0.0481	0.0073	0.0085	0.0193
glutamate	M+5	0.0211	0.0413	0.0177	0.0225	-0.0009	-0.0003	0.0033
glutamine	M+0	0.7264	0.6779	0.7192	0.5291	0.6456	0.7025	0.6424
glutamine	M+1	0.1372	0.16	0.1534	0.1659	0.1616	0.1369	0.1535
glutamine	M+2	0.0995	0.1168	0.0815	0.1698	0.1146	0.098	0.129
glutamine	M+3	0.0319	0.0417	0.0414	0.1015	0.0586	0.0468	0.0529
glutamine	M+4	0.002	0.0038	0.0026	0.0296	0.0135	0.0119	0.0167
glutamine	M+5	0.002	0.002	0.0034	0.0084	0.0059	0.0017	0.0057
glycine	M+0	0.9712	0.97	0.9712	0.9788	0.969	0.9736	0.9727
glycine	M+1	0.012	0.0171	0.0103	0.0062	0.0105	0.0125	0.0077
glycine	M+2	0.0156	0.0156	0.0192	0.0149	0.0203	0.0137	0.0197
lactate	M+0	0.5248	0.4423	0.5058	0.4659	0.5996	0.5737	0.5116
lactate	M+1	0.0389	0.0632	0.0582	0.0585	0.0583	0.0595	0.064
lactate	M+2	0.0491	0.0674	0.0585	0.0599	0.0486	0.0453	0.0594
lactate	M+3	0.3889	0.431	0.3797	0.4165	0.2939	0.3215	0.3644
malate	M+0	0.511	0.3268	0.6897	0.462	0.6354	0.6951	0.51
malate	M+1	0.0996	0.1011	0.1193	0.2005	0.1571	0.1487	0.156
malate	M+2	0.0854	0.0988	0.1054	0.1587	0.0832	0.0518	0.1311
malate	M+3	0.2927	0.473	0.0882	0.137	0.0835	0.0682	0.1361
malate	M+4	0.0096	0.0054	-0.0023	0.0401	0.0028	0.0038	0.0149
proline	M+0	0.996	0.9823	0.9579	0.9593	0.9581	1.0022	0.9789
proline	M+1	-0.0163	-0.0033	0.0144	-0.0004	0.0064	-0.0188	-0.0169
proline	M+2	0.016	0.0112	0.0177	0.0251	0.028	0.0159	0.0297
proline	M+3	0.0024	0.005	0.0063	0.0109	0.0058	0.0017	0.0092
proline	M+4	0.0019	0.0052	0.0054	0.0072	0.0017	-0.0004	0
proline	M+5	-0.0004	-0.0008	-0.0016	-0.0017	0	-0.0007	-0.0009
pyruvate	M+0	0.4991	0.4246	0.4738	0.6082	0.4218	0.6225	0.3631
serine	M+0	0.9004	0.9105	0.913	0.9017	0.9286	0.9621	0.9402
serine	M+1	0.0394	0.0362	0.0438	0.0499	0.0376	0.0214	0.0224
serine	M+2	0.0201	0.0278	0.0205	0.017	0.0188	0.0111	0.0215
serine	M+3	0.0378	0.0261	0.0214	0.037	0.0199	0.0096	0.0218
succinate	M+0	0.7379	0.8497	0.804	0.6297	0.7943	0.8064	0.6866
succinate	M+1	0.1174	0.0533	0.0859	0.1649	0.1214	0.13	0.1374
succinate	M+2	0.0966	0.0531	0.0969	0.1254	0.0642	0.0442	0.1123
succinate	M+3	0.038	0.0497	0.0127	0.0613	0.0118	0.0184	0.0451
succinate	M+4	0.0172	-0.001	0.0041	0.0238	0.0138	0.0047	0.0232

## Sheet: Fig1 S3 Ortho high rate infus
Metabolite	Label	Pancreas 1	Pancreas 2	Pancreas 3	Pancreas 4	Orthotopic KP-/-C 1	Orthotopic KP-/-C 2	Orthotopic KP-/-C 3	Orthotopic KP-/-C 4
aspartate	M+0	0.4491	0.5812	0.6099	0.3721	0.3408	0.4584	0.578	0.3655
aspartate	M+1	0.2226	0.1947	0.1852	0.2478	0.1633	0.1638	0.1169	0.1532
aspartate	M+2	0.1738	0.0947	0.1233	0.1886	0.2121	0.1823	0.1224	0.2001
aspartate	M+3	0.1105	0.0894	0.0624	0.1206	0.1754	0.135	0.1261	0.1732
aspartate	M+4	0.0441	0.0387	0.019	0.0728	0.1081	0.0611	0.0564	0.1087
citrate	M+0	0.7444	0.7961	0.8112	0.5558	0.2866	0.2617	0.2459	0.2233
citrate	M+1	0.084	0.1097	0.0906	0.168	0.1902	0.1676	0.1736	0.1881
citrate	M+2	0.0856	0.0556	0.0603	0.1225	0.1733	0.2086	0.2029	0.1878
citrate	M+3	0.0484	0.0231	0.0248	0.0797	0.1554	0.1675	0.1711	0.1748
citrate	M+4	0.0247	0.0103	0.0086	0.0412	0.109	0.1095	0.1142	0.1237
citrate	M+5	0.0096	0.0036	0.0036	0.0227	0.0568	0.0611	0.0679	0.0703
citrate	M+6	0.003	0.0013	0.0007	0.0087	0.0281	0.0224	0.0243	0.0311
malate	M+0	0.4202	0.5713	0.5968	0.3472	0.3207	0.3734	0.3573	0.3088
malate	M+1	0.2419	0.2091	0.2004	0.2572	0.1739	0.174	0.1522	0.1648
malate	M+2	0.1884	0.1001	0.1275	0.1995	0.193	0.1902	0.1667	0.1913
malate	M+3	0.1066	0.0801	0.0546	0.1295	0.1812	0.1739	0.2115	0.2004
malate	M+4	0.0454	0.0387	0.0208	0.0677	0.1304	0.0883	0.1079	0.1339
lactate	M+0	0.3616	0.3571	0.5184	0.3102	0.2343	0.2512	0.1885	0.189
lactate	M+1	0.0778	0.0861	0.0724	0.0647	0.0496	0.0574	0.053	0.0486
lactate	M+2	0.084	0.0885	0.0606	0.0796	0.0772	0.0758	0.0754	0.0785
lactate	M+3	0.4797	0.4711	0.3495	0.5451	0.6438	0.622	0.6909	0.6913
pyruvate	M+0	0.2885	0.2927	0.4752	0.1137	0.2361	0.2667	0.2044	0.2027
pyruvate	M+1	0.4324	0.4153	0.3169	0.825	0.0853	0.1378	0.0731	0.0758
pyruvate	M+2	0.063	0.0594	0.0487	0.0489	0.0751	0.0759	0.0766	0.0778
pyruvate	M+3	0.2131	0.2316	0.1571	0.0111	0.6026	0.5188	0.6464	0.6428
succinate	M+0	0.4333	0.5941	0.6004	0.4094	0.3651	0.3806	0.43	0.3465
succinate	M+1	0.2125	0.2005	0.2035	0.2089	0.1818	0.1549	0.1397	0.1661
succinate	M+2	0.2109	0.1164	0.1315	0.2095	0.2228	0.189	0.1991	0.2321
succinate	M+3	0.0897	0.0505	0.0391	0.0992	0.1265	0.1694	0.139	0.1421
succinate	M+4	0.0511	0.0379	0.0253	0.0793	0.1033	0.1058	0.0921	0.1125
