# Supplementary material for: Dissecting cell-type-specific metabolism in pancreatic ductal adenocarcinoma
Source: eLife journal article supplement (doi:10.7554/elife.56782), 2020-07-10
Supplement: supp [file elife-56782-supp-v1.zip › elife_poa_e56782_Figure_1_source_data_1.xlsx]

## Sheet: Fig 1 
Metabolite	Label	Pancreas 1	Pancreas 2	Pancreas 3	KP-/-C 1	KP-/-C 2	KP-/-C 3	KPC 1	KPC 2	KPC 3
a-KG	M+0	0.8763	0.9306	0.919	0.9056	0.781	0.6359	0.8568	0.8763	0.7633
a-KG	M+1	0.0584	0.0323	0.0389	0.042	0.0903	0.124	0.0635	0.0548	0.101
a-KG	M+2	0.0462	0.0246	0.0277	0.0432	0.109	0.1603	0.0645	0.0543	0.0997
a-KG	M+3	0.0178	0.011	0.0117	0.0049	0.0189	0.0561	0.0151	0.015	0.0264
a-KG	M+4	0.0012	-0.0009	0.0029	0.0026	0.0017	0.0186	-0.0003	-0.0018	0.0044
a-KG	M+5	0.0009	0.0034	0.0004	0.001	-0.0005	0.0071	0.001	0.0022	-0.0004
alanine	M+0	0.6909	0.6309	0.6693	0.7382	0.64	0.5976	0.6082	0.7124	0.7183
alanine	M+1	0.0707	0.0775	0.0684	0.0554	0.0717	0.0859	0.0841	0.0656	0.0721
alanine	M+2	0.0459	0.0549	0.0458	0.0433	0.0575	0.0646	0.0647	0.0416	0.0462
alanine	M+3	0.1946	0.2392	0.2189	0.1639	0.2328	0.2536	0.2456	0.1825	0.1649
asparagine	M+0	0.8378	0.8155	0.8267	1.0031	0.936	0.9549	0.9139	0.925	0.9658
asparagine	M+1	0.1206	0.1257	0.1142	-0.0061	0.0562	0.0404	0.0697	0.0664	0.029
asparagine	M+2	0.0183	0.0257	0.0227	-0.0026	-0.0021	-0.0041	0.0047	0.0004	-0.0018
asparagine	M+3	0.0175	0.026	0.0293	0.0055	0.0103	0.0063	0.007	0.0055	0.0039
asparagine	M+4	0.0047	0.0066	0.0071	0.0006	0.0008	0.0018	0.0032	0.0021	0.002
aspartate	M+0	0.8357	0.8146	0.802	0.841	0.6987	0.6439	0.785	0.8769	0.7809
aspartate	M+1	0.0743	0.0866	0.0944	0.0781	0.1314	0.1483	0.1111	0.0729	0.1118
aspartate	M+2	0.0547	0.0545	0.0527	0.0596	0.1313	0.1424	0.0795	0.0396	0.0856
aspartate	M+3	0.031	0.0383	0.0441	0.018	0.0295	0.0534	0.0221	0.0104	0.0208
aspartate	M+4	0.0041	0.0048	0.0058	0.0033	0.0083	0.0108	0.0017	-0.0004	0.0001
citrate	M+0	0.8212	0.8202	0.8195	0.7374	0.619	0.521	0.7518	0.8459	0.6959
citrate	M+1	0.1317	0.1255	0.1292	0.1592	0.218	0.2061	0.1499	0.1021	0.1547
citrate	M+2	0.0425	0.0451	0.0408	0.0565	0.0962	0.1707	0.0746	0.0438	0.1128
citrate	M+3	-0.0038	0.0013	0.0029	0.0377	0.0339	0.0488	0.0079	-0.0009	0.0163
citrate	M+4	0.008	0.0074	0.0079	0.0082	0.0342	0.0462	0.0151	0.0083	0.0176
citrate	M+5	-0.0002	-0.0001	-0.0007	0.0001	-0.0033	0.0019	-0.0003	-0.0002	0.0002
citrate	M+6	-0.0001	-0.0001	0	0.001	0.0026	0.003	0.0003	-0.0001	0.0001
fumarate	M+0	0.8339	0.8215	0.7933	0.8435	0.7106	0.6618	0.8447	0.9043	0.7993
fumarate	M+1	0.1059	0.1024	0.1203	0.0707	0.1534	0.1657	0.1071	0.0647	0.1207
fumarate	M+2	0.0353	0.0443	0.0475	0.0448	0.0863	0.1063	0.0394	0.0238	0.06
fumarate	M+3	0.0154	0.0229	0.0302	0.0159	0.0404	0.0499	0.0083	0.0032	0.018
fumarate	M+4	0.0069	0.0089	0.0078	0.0236	0.0095	0.0158	0.0028	0.0058	0.0003
glutamate	M+0	0.7591	0.7427	0.761	0.7746	0.6169	0.5387	0.7093	0.8186	0.6986
glutamate	M+1	0.154	0.1601	0.1504	0.0931	0.1701	0.1932	0.1702	0.1189	0.1659
glutamate	M+2	0.0579	0.065	0.0588	0.1066	0.1319	0.1581	0.0818	0.0452	0.0995
glutamate	M+3	0.024	0.0285	0.0255	0.0217	0.065	0.0806	0.0325	0.0144	0.029
glutamate	M+4	0.0043	0.0033	0.0036	0.0024	0.0115	0.023	0.0053	0.0027	0.0067
glutamate	M+5	0.0006	0.0002	0.0006	0.0016	0.0044	0.0057	0.0006	0.0001	0.0001
glutamine	M+0	0.7817	0.7553	0.7713	0.8516	0.6824	0.6818	0.7354	0.8494	0.7944
glutamine	M+1	0.0933	0.104	0.1013	0.0807	0.1351	0.1185	0.1063	0.0571	0.0853
glutamine	M+2	0.0958	0.1018	0.0935	0.0523	0.1351	0.1431	0.1201	0.0746	0.0963
glutamine	M+3	0.0201	0.0269	0.0255	0.0102	0.0308	0.0381	0.0284	0.013	0.0178
glutamine	M+4	0.0053	0.0043	0.0053	0.0036	0.0142	0.0132	0.0069	0.0028	0.0035
glutamine	M+5	0.0033	0.0074	0.0029	0.0012	0.003	0.0048	0.0027	0.0027	0.002
glycine	M+0	0.9619	0.9616	0.9586	0.9709	0.963	0.9388	0.9526	0.9761	0.9511
glycine	M+1	0.0199	0.0166	0.019	0.0121	0.0117	0.0247	0.0237	0.0124	0.0218
glycine	M+2	0.0196	0.023	0.0237	0.0173	0.0255	0.0378	0.0253	0.0126	0.0286
lactate	M+0	0.6946	0.654	0.6753	0.6508	0.6424	0.5634	0.57	0.7332	0.6824
lactate	M+1	0.0605	0.064	0.0643	0.0685	0.0668	0.0901	0.0864	0.054	0.0759
lactate	M+2	0.0476	0.0574	0.0557	0.0574	0.0588	0.077	0.0768	0.0454	0.0612
lactate	M+3	0.1965	0.2238	0.2042	0.2224	0.2312	0.2665	0.2653	0.1667	0.1789
malate	M+0	0.7656	0.7431	0.7447	0.8082	0.6562	0.5831	0.7305	0.8341	0.7525
malate	M+1	0.1459	0.146	0.1457	0.1001	0.1998	0.2092	0.1728	0.117	0.1423
malate	M+2	0.0598	0.0689	0.0626	0.0544	0.0903	0.1328	0.0706	0.0384	0.0818
malate	M+3	0.0196	0.0305	0.0348	0.0336	0.0422	0.0546	0.0182	0.0062	0.0179
malate	M+4	0.0087	0.0109	0.0117	0.0029	0.0126	0.0217	0.008	0.0039	0.0057
proline	M+0	0.9021	0.8902	0.8894	0.9978	0.9276	0.9205	0.9244	0.9574	0.9385
proline	M+1	0.0444	0.0452	0.0463	-0.0207	0.015	0.0179	0.0289	0.0147	0.0079
proline	M+2	0.0241	0.0259	0.0264	0.0131	0.0325	0.0329	0.0257	0.0166	0.0339
proline	M+3	0.0092	0.0106	0.0115	0.0039	0.0144	0.014	0.0098	0.0042	0.0087
proline	M+4	0.0012	0.0004	0.0009	0.0005	0.0033	0.0058	0.0022	0.0013	0.0051
proline	M+5	0.0005	0.0006	0.0006	0.0001	0.0007	0.002	0.0005	0	0.0005
pyruvate	M+0	0.7719	0.7789	0.783	0.706	0.6555	0.5878	0.65	0.7963	0.7363
pyruvate	M+1	0.0497	0.0513	0.0605	0.0575	0.1035	0.0809	0.075	0.0471	0.0619
pyruvate	M+2	0.0321	0.0324	0.0323	0.0476	0.0409	0.065	0.0622	0.0284	0.044
pyruvate	M+3	0.1363	0.1352	0.1125	0.188	0.1657	0.2617	0.2093	0.1213	0.152
serine	M+0	0.9106	0.904	0.9083	0.9329	0.9328	0.9051	0.9237	0.9513	0.9263
serine	M+1	0.0561	0.0584	0.0584	0.0288	0.0198	0.0499	0.0405	0.032	0.0457
serine	M+2	0.0098	0.0112	0.0088	0.0171	0.0222	0.0206	0.0098	0.0009	0.0068
serine	M+3	0.0243	0.0272	0.025	0.021	0.0268	0.0258	0.027	0.0162	0.0215
succinate	M+0	0.806	0.7592	0.7971	0.8042	0.675	0.6046	0.7711	0.8656	0.7726
succinate	M+1	0.1202	0.1312	0.1135	0.0931	0.1688	0.184	0.1292	0.0817	0.1227
succinate	M+2	0.0538	0.0727	0.0596	0.0763	0.1111	0.1463	0.0804	0.0446	0.0824
succinate	M+3	0.0146	0.0288	0.022	0.022	0.0343	0.0486	0.0132	0.0056	0.0183
succinate	M+4	0.0045	0.0068	0.0064	0.0039	0.0104	0.0164	0.0052	0.0015	0.0033
