# Supplementary material for: Dissecting cell-type-specific metabolism in pancreatic ductal adenocarcinoma
Source: eLife journal article supplement (doi:10.7554/elife.56782), 2020-07-10
Supplement: supp [file elife-56782-supp-v1.zip › elife_poa_e56782_Figure_2_source_data_1.xlsx]

## Sheet: Fig 2 Organid PSC Coculture
Metabolite	Label	Co-culture 1	Co-culture 2	Co-culture 3	Co-culture 4	Co-culture 5
a-KG	M+0	0.7448	0.7473	0.7381	0.7394	0.7505
a-KG	M+1	0.0103	0.0134	0.0056	0.0106	0.0131
a-KG	M+2	0.1316	0.1366	0.1416	0.1394	0.1306
a-KG	M+3	0.0284	0.0253	0.0291	0.0284	0.0285
a-KG	M+4	0.0555	0.0664	0.0582	0.0538	0.0532
a-KG	M+5	0.0275	0.0215	0.026	0.0276	0.0288
alanine	M+0	0.1335	0.1425	0.1328	0.1242	0.1334
alanine	M+1	0.0076	0.0069	0.0077	0.0073	0.0088
alanine	M+2	0.0401	0.0405	0.0404	0.0399	0.04
alanine	M+3	0.8213	0.8157	0.8219	0.8315	0.8219
asparagine	M+0	0.6855	0.7205	0.6692	0.6983	0.6367
asparagine	M+1	0.011	0.0233	0.015	0.0043	0.0024
asparagine	M+2	0.0974	0.0806	0.1012	0.1032	0.0799
asparagine	M+3	0.1537	0.1286	0.1348	0.1449	0.1088
asparagine	M+4	0.0192	0.0318	0.0154	0.0163	0.0144
aspartate	M+0	0.5782	0.6156	0.6076	0.5999	0.5759
aspartate	M+1	0.0303	0.0307	0.0304	0.0298	0.0275
aspartate	M+2	0.1331	0.124	0.1282	0.1301	0.135
aspartate	M+3	0.2064	0.185	0.1819	0.1878	0.2
aspartate	M+4	0.0549	0.0507	0.0545	0.0582	0.0612
citrate	M+0	0.4574	0.5449	0.4543	0.4211	0.44
citrate	M+1	0.0187	0.0009	0.0164	0.0245	0.0229
citrate	M+2	0.2928	0.2717	0.3016	0.3118	0.3004
citrate	M+3	0.045	0.0384	0.0517	0.049	0.0507
citrate	M+4	0.0875	0.0698	0.0841	0.1029	0.0932
citrate	M+5	0.0816	0.072	0.0741	0.0762	0.0807
citrate	M+6	0.0157	0.0103	0.0172	0.0152	0.0135
glutamate	M+0	0.7276	0.7387	0.7222	0.7225	0.7231
glutamate	M+1	0.0043	0.0034	0.0068	0.0065	0.0036
glutamate	M+2	0.1515	0.1508	0.1565	0.1574	0.1528
glutamate	M+3	0.0323	0.0298	0.032	0.032	0.0333
glutamate	M+4	0.0502	0.049	0.0503	0.0496	0.0527
glutamate	M+5	0.0321	0.0281	0.03	0.0305	0.0322
glutamine	M+0	0.9781	0.9885	0.9691	0.9739	0.9861
glutamine	M+1	0.0216	0.0125	0.0282	0.0273	0.0162
glutamine	M+2	0.001	-0.0005	0.0037	0.0028	-0.0018
glutamine	M+3	-0.0014	-0.0012	-0.002	-0.0023	-0.0011
glutamine	M+4	0.0002	0.0004	0	-0.0021	0.0002
glutamine	M+5	-0.0001	0	0.0003	0	0
glycine	M+0	0.9693	0.9668	0.9562	0.9585	0.9661
glycine	M+1	0.0039	-0.003	0.0031	0.0011	-0.0018
glycine	M+2	0.0267	0.0349	0.0403	0.0396	0.0347
lactate	M+0	0.0763	0.0751	0.0764	0.0709	0.0733
lactate	M+1	0.0062	0.0063	0.0066	0.0064	0.0064
lactate	M+2	-0.0009	0.008	-0.0018	-0.0019	0.0035
lactate	M+3	0.8992	0.8964	0.8983	0.9049	0.9005
malate	M+0	0.5892	0.4988	0.4862	0.409	0.4705
malate	M+1	0.0158	0.0236	0.0221	0.0188	0.0252
malate	M+2	0.1234	0.1029	0.1026	0.0973	0.1037
malate	M+3	0.2021	0.1972	0.1858	0.1973	0.2186
malate	M+4	0.028	0.0341	0.0339	0.0378	0.0329
proline	M+0	0.8393	0.8275	0.8207	0.8193	0.8388
proline	M+1	-0.0136	-0.0105	-0.013	-0.0137	-0.0192
proline	M+2	0.106	0.1088	0.1231	0.1233	0.1113
proline	M+3	0.0164	0.0164	0.0162	0.0167	0.0191
proline	M+4	0.0317	0.0336	0.0334	0.0344	0.0301
proline	M+5	0.019	0.0198	0.0197	0.019	0.0196
pyruvate	M+0	0.0705	0.0686	0.0673	0.0621	0.067
pyruvate	M+1	0.008	0.008	0.0067	0.0068	0.009
pyruvate	M+2	0.0414	0.0405	0.0415	0.0418	0.0413
pyruvate	M+3	0.8778	0.8835	0.8811	0.8862	0.8803
serine	M+0	0.9399	0.9479	0.9362	0.9393	0.9503
serine	M+1	0.0188	0.0143	0.0215	0.0173	0.012
serine	M+2	0.0138	0.0115	0.0134	0.015	0.0116
serine	M+3	0.0278	0.0266	0.0291	0.0285	0.0262
succinate	M+0	0.7115	0.7052	0.7556	0.7255	0.6962
succinate	M+1	0.0127	0.0249	0.0083	0.0137	0.0166
succinate	M+2	0.1247	0.1259	0.1177	0.1206	0.1164
succinate	M+3	0.0856	0.0828	0.0567	0.0575	0.0736
succinate	M+4	0.0586	0.0441	0.0535	0.0765	0.0853
