# Supplementary material for: Dissecting cell-type-specific metabolism in pancreatic ductal adenocarcinoma
Source: eLife journal article supplement (doi:10.7554/elife.56782), 2020-07-10
Supplement: supp [file elife-56782-supp-v1.zip › elife_poa_e56782_Figure_3_source_data_1.xlsx]

## Sheet: Fig 3 Time course
Totial ion counts	Free metabolites
Metabolite		0 min 1	0 min 2	0 min 3	5 min 1	5 min 2	5 min 3	30 min 1	30 min 2	30 min 3	120 min 1	120 min 2	120 min 3	240 min 1	240 min 2	240 min 3
a-KG		3108675	4933730	5044653	4366607	6268412	4823599	2366497	2179380	1868185	754024	932737	1615543	290147	396663	462915
alanine		12928053	19868386	18927581	17139719	19496598	22971821	18295517	18222756	18838000	25703620	22343859	25655576	31150340	29291124	23393914
asparagine		1068473	1461583	1758047	1410236	1903913	1475475	1281541	1896513	1408097	1630111	1598918	1699120	1526433	1820082	1454446
aspartate		13194268	16392809	18558509	15638093	21358622	19162175	18131571	21123415	21628468	40410436	34831746	30170057	54084542	56893979	43941926
citrate		2088728	2935609	3085770	1964296	2799435	3081527	1771927	2148259	1955708	559767	614466	838651	432838	526098	510242
fumarate		5643368	8294027	8951001	6252684	6655375	7270815	5719853	5769778	5771888	4211981	3720202	5384085	2367341	3319401	2958636
glutamate		191348857	228394759	254418499	231406943	268295565	225535025	208499115	250611486	207157549	177913247	181118474	208989899	145578832	163640317	143124287
glutamine		86425212	107539230	121494541	80084060	94054463	96097577	77483049	96603241	84765776	72040170	71547655	71255220	50711255	57804676	48197593
glycine		58576001	78091521	76661410	70444418	74134390	87357323	69390529	69528585	61186052	74580581	65356922	76865590	68046242	66525696	59604278
lactate		63678250	98181237	92778250	31441463	39047612	47668898	44832759	48218152	44960975	55140673	56951547	72989508	22077359	34804651	37741296
malate		7782210	10859382	12018801	10931403	14614496	12478514	11097072	10676022	9868767	6554223	7660115	9850812	3416394	4963483	4630667
proline		16838868	23810218	22530200	16324723	23557368	23919763	21409455	21251148	16993844	33519112	32470258	28518649	40672062	55555769	39006623
pyruvate		6618108	11157897	10137577	3093759	4049371	4494997	3380342	3617033	3580500	5191868	4928044	6973132	2941126	4020692	4558796
serine		24252924	30014198	35296548	28825777	28074730	32114370	27744885	27196092	28328343	35092671	30451561	32654075	31602227	35470943	28803688
succinate		2237237	2968324	3417181	1046615	1212552	1544480	866934	830157	737171	965078	968002	1524046	652754	905712	863938
Labeling	Free metabolites
Metabolite	Label	0 min 1	0 min 2	0 min 3	5 min 1	5 min 2	5 min 3	30 min 1	30 min 2	30 min 3	120 min 1	120 min 2	120 min 3	240 min 1	240 min 2	240 min 3
a-KG	M+0	0.7361	0.7448	0.7514	0.7541	0.7448	0.7507	0.7425	0.7405	0.7495	0.7404	0.7353	0.7397	0.7556	0.7593	0.7357
a-KG	M+1	0.0117	-0.0077	-0.0033	-0.001	0.0005	-0.001	0.0006	0.0006	0.0005	0.0052	-0.0008	0.0016	0.015	0.0042	0.0127
a-KG	M+2	0.1761	0.1803	0.1745	0.1693	0.1735	0.1714	0.1757	0.1784	0.1732	0.162	0.1776	0.1746	0.1523	0.159	0.1646
a-KG	M+3	0.0236	0.0262	0.0267	0.0269	0.0288	0.0271	0.0282	0.0276	0.0259	0.0331	0.0288	0.0298	0.0304	0.0286	0.033
a-KG	M+4	0.0403	0.0421	0.0381	0.0368	0.0383	0.0376	0.0387	0.0385	0.0359	0.0415	0.0408	0.0384	0.035	0.0344	0.0382
a-KG	M+5	0.0119	0.0148	0.0128	0.0141	0.0147	0.0144	0.0149	0.0149	0.0145	0.0175	0.0178	0.0156	0.0142	0.0147	0.0181
alanine	M+0	0.0656	0.0615	0.0621	0.0575	0.0563	0.0571	0.0618	0.0637	0.0663	0.11	0.103	0.081	0.1803	0.1708	0.135
alanine	M+1	0.0077	0.0081	0.009	0.0082	0.0084	0.0083	0.0091	0.0089	0.0091	0.0155	0.0149	0.0114	0.0255	0.0244	0.0202
alanine	M+2	-0.0013	-0.0069	-0.004	-0.006	0.004	-0.0069	-0.0062	-0.0014	-0.0028	0.0409	0.045	0.0293	0.0588	0.0564	0.0528
alanine	M+3	0.9305	0.9447	0.9378	0.9413	0.9316	0.9394	0.9367	0.9283	0.9262	0.8337	0.8377	0.8776	0.7358	0.7486	0.7925
asparagine	M+0	0.7363	0.7023	0.7031	0.7054	0.7053	0.6969	0.7014	0.7072	0.729	0.7027	0.7017	0.6987	0.7048	0.7037	0.7161
asparagine	M+1	0.0109	0.035	0.0297	0.0306	0.0219	0.0327	0.0239	0.0262	0.0262	0.0211	0.0264	0.0294	0.0251	0.0188	0.0269
asparagine	M+2	0.1254	0.1353	0.1262	0.1364	0.1363	0.1323	0.1409	0.1353	0.1286	0.1364	0.136	0.1284	0.1316	0.1364	0.1392
asparagine	M+3	0.1058	0.0993	0.1122	0.1026	0.111	0.1122	0.1094	0.1107	0.0956	0.1168	0.1111	0.1168	0.1144	0.1146	0.0955
asparagine	M+4	0.01	0.0178	0.0188	0.0199	0.0226	0.0234	0.0212	0.0189	0.0194	0.0195	0.0204	0.0206	0.0213	0.0199	0.0185
aspartate	M+0	0.7084	0.7123	0.718	0.7215	0.7117	0.7207	0.7148	0.7182	0.7204	0.7085	0.7035	0.708	0.7345	0.7258	0.7173
aspartate	M+1	0.0139	-0.0003	0.0086	0.0092	0.0113	0.0089	0.0104	0.0094	0.0105	0.0129	0.0141	0.0128	0.0146	0.0163	0.0137
aspartate	M+2	0.1754	0.1705	0.1612	0.1626	0.1668	0.1618	0.1659	0.1675	0.1667	0.1736	0.174	0.1713	0.1602	0.1627	0.1679
aspartate	M+3	0.0805	0.1003	0.0959	0.0897	0.0926	0.0916	0.0899	0.0861	0.0835	0.0809	0.0834	0.0848	0.0687	0.0724	0.0759
aspartate	M+4	0.0224	0.0159	0.0158	0.0164	0.0173	0.0162	0.0185	0.0181	0.0184	0.0236	0.0248	0.0229	0.0214	0.0224	0.025
citrate	M+0	0.1543	0.1594	0.1663	0.1768	0.1797	0.1849	0.2371	0.2465	0.2509	0.2365	0.2658	0.2505	0.2381	0.2374	0.2327
citrate	M+1	0.041	-0.0292	-0.0141	0.0075	-0.0002	0.0118	0.0242	0.0171	0.0282	0.0362	0.0382	0.0268	0.0414	0.0392	0.0334
citrate	M+2	0.5202	0.6163	0.6022	0.5698	0.57	0.5583	0.5138	0.5118	0.5074	0.4891	0.4745	0.4923	0.4913	0.4931	0.4962
citrate	M+3	0.0539	0.0025	0.008	0.01	0.0104	0.0141	0.0101	0.0182	0.0122	0.0213	0.0177	0.0232	0.0178	0.0185	0.027
citrate	M+4	0.1579	0.1638	0.1529	0.1519	0.1529	0.1488	0.1399	0.1335	0.1304	0.1359	0.126	0.1319	0.1388	0.1271	0.138
citrate	M+5	0.0433	0.0689	0.0679	0.0658	0.0684	0.0663	0.0587	0.0588	0.0569	0.0625	0.0608	0.058	0.0567	0.0697	0.0588
citrate	M+6	0.0347	0.0156	0.0158	0.017	0.0161	0.0133	0.0133	0.0116	0.0125	0.0133	0.0151	0.0156	0.0133	0.01	0.0101
fumarate	M+0	0.7002	0.676	0.6956	0.695	0.6882	0.6927	0.6892	0.6918	0.6905	0.6823	0.678	0.6746	0.6954	0.6929	0.6815
fumarate	M+1	0.0261	0.0349	0.0258	0.0238	0.0235	0.0247	0.0215	0.019	0.0207	0.0207	0.0244	0.0252	0.0197	0.0252	0.0224
fumarate	M+2	0.1538	0.1657	0.1622	0.1599	0.1647	0.1612	0.1672	0.1676	0.1673	0.1638	0.1646	0.1706	0.1469	0.1481	0.1558
fumarate	M+3	0.0813	0.084	0.077	0.0746	0.078	0.0781	0.0739	0.0733	0.0717	0.0651	0.0666	0.07	0.05	0.0524	0.06
fumarate	M+4	0.0384	0.0396	0.0403	0.0469	0.0452	0.0434	0.0477	0.0488	0.0495	0.0679	0.0657	0.0591	0.0866	0.079	0.0793
glutamate	M+0	0.7368	0.6931	0.7049	0.7075	0.6973	0.7083	0.7025	0.6974	0.7089	0.7046	0.6988	0.7	0.7334	0.7291	0.7176
glutamate	M+1	0.0119	0.0448	0.0406	0.0384	0.0388	0.0352	0.0352	0.038	0.0349	0.0335	0.0345	0.0348	0.0349	0.0347	0.0323
glutamate	M+2	0.1712	0.172	0.1736	0.1722	0.1766	0.1748	0.1762	0.1785	0.1753	0.1748	0.1782	0.1787	0.1573	0.1606	0.1685
glutamate	M+3	0.0342	0.0336	0.0285	0.0277	0.0297	0.0277	0.0298	0.0297	0.0277	0.0299	0.0299	0.0292	0.026	0.0261	0.0278
glutamate	M+4	0.0317	0.0439	0.0404	0.0412	0.0435	0.0412	0.0427	0.0428	0.0406	0.0427	0.0438	0.0431	0.0366	0.0373	0.0401
glutamate	M+5	0.0147	0.0121	0.0116	0.0127	0.0138	0.0128	0.0134	0.0134	0.0126	0.0143	0.0146	0.014	0.0116	0.0121	0.0136
glutamine	M+0	0.9537	0.9886	0.9834	0.992	0.986	0.9866	0.9926	0.985	0.9883	0.9906	0.9893	0.9917	0.9929	0.9914	0.995
glutamine	M+1	0.0468	-0.0018	0.0057	-0.0024	0.0037	0.0042	-0.003	0.004	0.0019	-0.0021	-0.0006	-0.0024	-0.0064	-0.0047	-0.0071
glutamine	M+2	0.0024	0.0156	0.0129	0.0107	0.0113	0.0103	0.0107	0.0118	0.0103	0.0097	0.0106	0.0102	0.0114	0.0113	0.0104
glutamine	M+3	-0.0054	-0.0037	-0.003	-0.0014	-0.0023	-0.0022	-0.0016	-0.0024	-0.0018	-0.0004	-0.0015	-0.0012	-0.0004	-0.0002	-0.0005
glutamine	M+4	0.0022	0.0005	0.0003	0.0005	0.0006	0.0005	0.0007	0.0008	0.0006	0.0013	0.0013	0.001	0.0015	0.0012	0.0013
glutamine	M+5	0.0004	0.0008	0.0007	0.0007	0.0007	0.0007	0.0007	0.0008	0.0007	0.0009	0.001	0.0008	0.001	0.001	0.001
glycine	M+0	0.7973	0.782	0.7984	0.7925	0.7769	0.7762	0.7808	0.7794	0.7877	0.7641	0.7611	0.7626	0.7533	0.7536	0.753
glycine	M+1	0.0323	0.0308	0.0261	0.0295	0.0323	0.0313	0.0308	0.0327	0.0296	0.0353	0.0339	0.0344	0.0334	0.0339	0.0343
glycine	M+2	0.1719	0.1893	0.176	0.1779	0.1908	0.1926	0.189	0.1884	0.1829	0.2007	0.2052	0.2031	0.2131	0.2128	0.2133
lactate	M+0	0.0366	0.0319	0.0333	0.0457	0.0404	0.0363	0.0768	0.0853	0.0887	0.1934	0.18	0.1365	0.2569	0.2639	0.2323
lactate	M+1	0.0041	0.0043	0.0038	0.0044	0.0045	0.0045	0.0079	0.0099	0.0099	0.0236	0.022	0.0169	0.0261	0.0298	0.0283
lactate	M+2	-0.0041	-0.0038	-0.0039	-0.0047	-0.0046	-0.0039	-0.007	-0.0076	-0.0098	0.0613	0.0599	0.0487	0.0644	0.0684	0.067
lactate	M+3	0.9536	0.9489	0.9537	0.9552	0.9595	0.9599	0.9206	0.9105	0.9104	0.7228	0.739	0.7953	0.6568	0.6414	0.6757
malate	M+0	0.7092	0.6843	0.6993	0.7103	0.7013	0.7099	0.7063	0.7053	0.7111	0.7085	0.7063	0.7018	0.7483	0.7395	0.7237
malate	M+1	0.0294	0.0282	0.0203	0.0165	0.0181	0.0159	0.0151	0.0162	0.0152	0.0157	0.0142	0.0151	0.0121	0.0137	0.0168
malate	M+2	0.1499	0.1798	0.1734	0.1739	0.1763	0.172	0.1795	0.1801	0.1778	0.1793	0.1817	0.1839	0.1611	0.166	0.1687
malate	M+3	0.0934	0.0802	0.0827	0.076	0.0806	0.0796	0.0733	0.0731	0.0723	0.0664	0.0683	0.0711	0.0541	0.0553	0.063
malate	M+4	0.0178	0.0272	0.0223	0.0232	0.0241	0.0228	0.0263	0.0254	0.0241	0.0297	0.03	0.028	0.0242	0.0246	0.0276
proline	M+0	0.7857	0.7596	0.7697	0.7623	0.7538	0.7597	0.7566	0.7574	0.7613	0.7363	0.7368	0.7423	0.7474	0.7441	0.7394
proline	M+1	-0.0167	0.0028	0.0004	-0.0006	0.0016	-0.0011	-0.0003	-0.0021	-0.0011	0.0018	0.0007	0.0002	0.0021	0.0041	0.0021
proline	M+2	0.1656	0.164	0.1632	0.1664	0.1692	0.1688	0.1685	0.1705	0.167	0.1763	0.1764	0.1755	0.169	0.1704	0.1739
proline	M+3	0.0216	0.025	0.0218	0.0219	0.0234	0.0221	0.0235	0.0229	0.0234	0.0261	0.0263	0.025	0.0254	0.0257	0.0259
proline	M+4	0.0313	0.036	0.0338	0.0366	0.038	0.0367	0.0381	0.0374	0.0356	0.0425	0.0428	0.041	0.0401	0.0399	0.0419
proline	M+5	0.0113	0.0111	0.0099	0.0123	0.0122	0.0117	0.0118	0.0122	0.0114	0.0153	0.0155	0.0143	0.0142	0.0146	0.015
pyruvate	M+0	0.0363	0.0351	0.0364	0.0682	0.0595	0.054	0.0878	0.1066	0.1098	0.201	0.1869	0.1416	0.2895	0.2855	0.2486
pyruvate	M+1	0.0091	0.0128	0.0137	0.0157	0.0141	0.0132	0.0212	0.0268	0.0214	0.0345	0.0376	0.0226	0.0465	0.0486	0.0445
pyruvate	M+2	0.03	0.0144	0.0239	0.0304	0.0283	0.0276	0.0374	0.0483	0.047	0.0605	0.057	0.0535	0.0696	0.0686	0.0687
pyruvate	M+3	0.9233	0.9372	0.9255	0.8844	0.8986	0.9048	0.8504	0.8195	0.8209	0.7019	0.7187	0.7813	0.5922	0.5952	0.6367
serine	M+0	0.6268	0.5779	0.5935	0.5698	0.5396	0.5474	0.5326	0.5282	0.5387	0.4652	0.4475	0.4712	0.4321	0.433	0.4305
serine	M+1	0.0756	0.1062	0.1029	0.1199	0.1324	0.1295	0.1502	0.1518	0.144	0.1842	0.1909	0.175	0.2245	0.2225	0.2194
serine	M+2	0.055	0.0451	0.0454	0.0549	0.0592	0.0573	0.0643	0.0646	0.0642	0.0772	0.0791	0.075	0.0855	0.0866	0.0868
serine	M+3	0.2444	0.2802	0.2631	0.2593	0.273	0.2699	0.2574	0.2586	0.2574	0.2775	0.2857	0.283	0.2611	0.2613	0.2672
succinate	M+0	0.7512	0.7312	0.7474	0.7593	0.7508	0.7554	0.7444	0.7402	0.7477	0.7568	0.759	0.7447	0.7964	0.7917	0.7726
succinate	M+1	0.0135	0.0079	0.0014	-0.0001	0.0015	0.0003	0.0024	0.0023	-0.0054	0.0064	0.0023	0.0062	0.0063	0.0071	0.0049
succinate	M+2	0.1641	0.1843	0.177	0.1634	0.1708	0.1671	0.1666	0.1713	0.1793	0.1566	0.1584	0.1718	0.1283	0.137	0.1528
succinate	M+3	0.0477	0.0481	0.0477	0.0487	0.0469	0.0446	0.0505	0.0539	0.0474	0.0507	0.0506	0.0494	0.0362	0.0362	0.042
succinate	M+4	0.0219	0.0273	0.0259	0.0265	0.029	0.0302	0.0317	0.0322	0.0292	0.0274	0.0277	0.0263	0.0265	0.0245	0.0252
Labeling	Protein Hydrolysates
Amino Acid	Label	0 min 1	0 min 2	0 min 3	5 min 1	5 min 2	5 min 3	30 min 1	30 min 2	30 min 3	120 min 1	120 min 2	120 min 3	240 min 1	240 min 2	240 min 3
alanine	M+0	0.1463	0.1484	0.1458	0.1208	0.12	0.1277	0.1201	0.1223	0.1193	0.1213	0.1163	0.12	0.121	0.1215	0.1229
alanine	M+1	0.0059	0.008	0.0083	0.0082	0.0079	0.0079	0.0086	0.008	0.0081	0.0081	0.0083	0.008	0.0084	0.0084	0.008
alanine	M+2	0.0356	0.0339	0.0299	0.0271	0.0177	0.025	0.035	0.0054	0.016	0.0097	0.017	0.013	0.0255	0.0188	0.0131
alanine	M+3	0.8158	0.8159	0.815	0.8405	0.8496	0.8356	0.8331	0.8596	0.8536	0.8562	0.8549	0.8538	0.8408	0.8465	0.8523
aspartate	M+0	0.8119	0.7963	0.7963	0.7795	0.7761	0.7848	0.7747	0.7805	0.7809	0.7664	0.7618	0.7708	0.7738	0.7767	0.7719
aspartate	M+1	-0.0125	0.0078	0.011	0.0148	0.0141	0.0147	0.0146	0.0157	0.0149	0.017	0.0191	0.015	0.0153	0.0138	0.016
aspartate	M+2	0.1423	0.1239	0.1221	0.129	0.1305	0.1265	0.1314	0.129	0.1286	0.1318	0.1334	0.1313	0.1306	0.1295	0.1316
aspartate	M+3	0.0469	0.0642	0.063	0.0673	0.0699	0.0655	0.0691	0.0655	0.0666	0.0739	0.0744	0.0729	0.0702	0.0703	0.0702
aspartate	M+4	0.011	0.0073	0.0073	0.0091	0.0091	0.0082	0.0098	0.0088	0.0087	0.0108	0.011	0.0097	0.0099	0.0094	0.0101
glutamate	M+0	0.8726	0.8419	0.8489	0.8367	0.8357	0.8439	0.8338	0.838	0.8394	0.8284	0.8229	0.8336	0.8342	0.8381	0.8319
glutamate	M+1	0.0205	0.0318	0.0285	0.0285	0.0273	0.0278	0.0296	0.0309	0.0292	0.0303	0.0331	0.0273	0.0284	0.0275	0.0295
glutamate	M+2	0.0691	0.0932	0.0923	0.0995	0.1008	0.097	0.1006	0.0973	0.0979	0.1027	0.104	0.1018	0.1005	0.0991	0.1013
glutamate	M+3	0.0214	0.0111	0.0097	0.0117	0.0117	0.0104	0.0114	0.0115	0.0108	0.0125	0.0124	0.0118	0.0122	0.0113	0.0118
glutamate	M+4	0.0115	0.0176	0.0162	0.0183	0.0189	0.0166	0.0191	0.0174	0.0175	0.02	0.0207	0.0195	0.019	0.0184	0.0193
glutamate	M+5	0.0046	0.0043	0.0043	0.0051	0.0055	0.0043	0.0054	0.0048	0.005	0.0059	0.0067	0.0059	0.0056	0.0054	0.006
glycine	M+0	0.8717	0.8705	0.8686	0.8647	0.852	0.8631	0.8562	0.8622	0.8638	0.8548	0.851	0.8542	0.856	0.8596	0.8571
glycine	M+1	0.0137	0.0062	0.0142	0.0158	0.0184	0.014	0.0175	0.0167	0.0156	0.0185	0.0181	0.0186	0.0179	0.0171	0.0178
glycine	M+2	0.1153	0.1241	0.1173	0.119	0.1294	0.1226	0.1262	0.121	0.1205	0.1265	0.1311	0.127	0.1256	0.123	0.1249
proline	M+0	0.8504	0.8234	0.8284	0.8156	0.8121	0.8206	0.8119	0.8155	0.8183	0.807	0.8056	0.8117	0.8118	0.8154	0.8113
proline	M+1	-0.0175	0.0005	-0.0003	-0.0002	0	-0.0004	0.0002	0.0014	-0.0002	0.0016	0.0007	-0.0008	0.0001	-0.0009	-0.0003
proline	M+2	0.1254	0.1334	0.1318	0.1398	0.1421	0.1379	0.1412	0.1397	0.1392	0.1437	0.1449	0.1417	0.1411	0.1407	0.1416
proline	M+3	0.0172	0.014	0.0129	0.0141	0.0147	0.0137	0.015	0.0139	0.0135	0.015	0.0153	0.0151	0.0151	0.0136	0.0151
proline	M+4	0.0176	0.0218	0.0208	0.0233	0.0236	0.0217	0.0241	0.0223	0.0223	0.0246	0.0252	0.0245	0.0241	0.0237	0.0244
proline	M+5	0.006	0.0055	0.0053	0.0061	0.0064	0.0055	0.0064	0.0059	0.0059	0.0067	0.0071	0.0066	0.0065	0.0063	0.0068
serine	M+0	0.7452	0.6923	0.6998	0.6943	0.6753	0.6892	0.6839	0.6885	0.696	0.6773	0.6688	0.6765	0.6826	0.6851	0.6812
serine	M+1	0.0301	0.0715	0.0689	0.0708	0.0756	0.0695	0.0739	0.07	0.0678	0.0771	0.0784	0.0754	0.0737	0.0723	0.0751
serine	M+2	0.0368	0.0286	0.0298	0.0327	0.0358	0.0328	0.0334	0.0331	0.0325	0.0361	0.0375	0.0362	0.0345	0.0328	0.0354
serine	M+3	0.1919	0.2118	0.2043	0.2045	0.2158	0.2105	0.2114	0.2105	0.2058	0.2121	0.2181	0.2144	0.2116	0.2122	0.2106
