# Supplementary material for: Dissecting cell-type-specific metabolism in pancreatic ductal adenocarcinoma
Source: eLife journal article supplement (doi:10.7554/elife.56782), 2020-07-10
Supplement: supp [file elife-56782-supp-v1.zip › elife_poa_e56782_Figure_4_figure_supplement_1_source_data_1.xlsx]

## Sheet: Fig4 S1 Organoid PSC sort gln
Amino Acid	Label	Organoid 1 Day	Organoid 2 Day	Organoid 3 Day	Organoid 4 Day	PSC 1 Day	PSC 2 Day	PSC 3 Day	PSC 4 Day
aspartate	M+0	0.713	0.5242	0.4031	0.3973	0.662	0.4438	0.3562	0.3866
aspartate	M+1	0.0251	0.0456	0.0668	0.0739	0.025	0.0546	0.0726	0.0752
aspartate	M+2	0.056	0.0947	0.128	0.1325	0.0686	0.1143	0.1386	0.139
aspartate	M+3	0.0631	0.1038	0.0956	0.0909	0.0714	0.0967	0.0923	0.091
aspartate	M+4	0.1439	0.2361	0.31	0.3075	0.1749	0.2946	0.3442	0.3146
glutamate	M+0	0.5751	0.3359	0.2279	0.2175	0.5235	0.2837	0.2071	0.2156
glutamate	M+1	0.0145	0.024	0.0398	0.0412	0.0127	0.0274	0.0374	0.0419
glutamate	M+2	0.0188	0.0298	0.0368	0.0377	0.0193	0.0296	0.0353	0.0398
glutamate	M+3	0.0463	0.0731	0.0962	0.0986	0.0531	0.089	0.1058	0.1045
glutamate	M+4	0.014	0.0224	0.0249	0.0248	0.0165	0.0231	0.0235	0.0238
glutamate	M+5	0.3327	0.5163	0.5783	0.5826	0.3782	0.5503	0.5945	0.5788
proline	M+0	0.6847	0.4431	0.2995	0.2866	0.6393	0.4076	0.3182	0.3264
proline	M+1	0.0007	0.0196	0.0403	0.0436	0.0014	0.0251	0.0375	0.0446
proline	M+2	0.0221	0.0351	0.0443	0.0494	0.0227	0.0348	0.0415	0.0458
proline	M+3	0.0537	0.0961	0.1353	0.1392	0.0634	0.1116	0.1352	0.1357
proline	M+4	0.0091	0.0157	0.0187	0.0182	0.0108	0.0158	0.0169	0.0151
proline	M+5	0.2337	0.3964	0.4707	0.4715	0.2672	0.4123	0.4613	0.4395
