# Supplementary material for: Dissecting cell-type-specific metabolism in pancreatic ductal adenocarcinoma
Source: eLife journal article supplement (doi:10.7554/elife.56782), 2020-07-10
Supplement: supp [file elife-56782-supp-v1.zip › elife_poa_e56782_Figure_4_source_data_1.xlsx]

## Sheet: Fig 4 Organoid PSC sort glucose
Amino Acid	Label	Organoid 1 Day	Organoid 2 Day	Organoid 3 Day	Organoid 4 Day	PSC 1 Day	PSC 2 Day	PSC 3 Day	PSC 4 Day
alanine	M+0	0.7754	0.4476	0.273	0.1904	0.5459	0.3881	0.2852	0.2181
alanine	M+1	0.0005	0.0089	0.0105	0.0194	0.0028	0.0075	0.0116	0.0166
alanine	M+2	0.0061	0.0279	0.0416	0.0432	0.0129	0.0322	0.0338	0.0353
alanine	M+3	0.1134	0.498	0.666	0.715	0.2482	0.5699	0.6683	0.7124
aspartate	M+0	0.913	0.6694	0.5368	0.4924	0.8486	0.6954	0.6191	0.5678
aspartate	M+1	0.0095	0.0304	0.0355	0.0386	0.0142	0.0306	0.0333	0.0406
aspartate	M+2	0.0318	0.1104	0.1524	0.1594	0.0643	0.1213	0.148	0.153
aspartate	M+3	0.038	0.1348	0.1839	0.2083	0.0645	0.1163	0.1452	0.1721
aspartate	M+4	0.0064	0.0569	0.0928	0.1052	0.0062	0.0374	0.0557	0.0704
glutamate	M+0	0.9241	0.709	0.6038	0.5571	0.9068	0.7491	0.6897	0.642
glutamate	M+1	0.0085	0.0086	0.0101	0.0147	0.0068	0.0083	0.0072	0.0091
glutamate	M+2	0.038	0.1085	0.1325	0.135	0.0606	0.121	0.1348	0.1478
glutamate	M+3	0.0119	0.0512	0.07	0.0711	0.0101	0.0404	0.0504	0.0599
glutamate	M+4	0.0103	0.0674	0.0977	0.1122	0.0097	0.0529	0.0718	0.0828
glutamate	M+5	0.0055	0.0575	0.0882	0.1204	0.0036	0.0291	0.0469	0.0606
glycine	M+0	0.9769	0.9218	0.8678	0.8262	0.951	0.9209	0.8827	0.8208
glycine	M+1	0.0003	0.005	0.0069	0.001	0.0039	0.0019	0	0.0097
glycine	M+2	0.0198	0.0742	0.1239	0.1703	0.0388	0.0766	0.1162	0.1734
proline	M+0	0.9378	0.7665	0.6456	0.6081	0.88	0.7598	0.6774	0.6377
proline	M+1	-0.0116	0.0002	0.0029	0.0153	0.002	-0.0031	0.0019	0.005
proline	M+2	0.0322	0.1052	0.1547	0.1582	0.0571	0.1297	0.1568	0.1706
proline	M+3	0.0082	0.0418	0.0558	0.0653	0.01	0.0368	0.0494	0.0552
proline	M+4	0.0072	0.0499	0.0795	0.0855	0.0093	0.0488	0.0706	0.0793
proline	M+5	0.004	0.0362	0.0617	0.0695	0.0042	0.0278	0.0427	0.0519
serine	M+0	0.9368	0.81	0.6463	0.5275	0.8746	0.7736	0.6596	0.5467
serine	M+1	0.0224	0.0766	0.1371	0.1742	0.0394	0.0725	0.105	0.1369
serine	M+2	0.0099	0.034	0.0548	0.0632	0.0192	0.0327	0.0466	0.0594
serine	M+3	0.03	0.0821	0.1653	0.2503	0.0639	0.1224	0.1905	0.2627
