# Supplementary material for: Dissecting cell-type-specific metabolism in pancreatic ductal adenocarcinoma
Source: eLife journal article supplement (doi:10.7554/elife.56782), 2020-07-10
Supplement: supp [file elife-56782-supp-v1.zip › elife_poa_e56782_Figure_5_source_data_1.xlsx]

## Sheet: Fig 5 24 hour infusion
Amino Acid	Label	KP-/-C 1				KP-/-C 2				KP-/-C 3				KP-/-C 4				KP-/-C 5
		Unsorted	Cancer Cells	Fibroblast	Hemtopoietic	Unsorted	Cancer Cells	Fibroblast	Hemtopoietic	Unsorted	Cancer Cells	Fibroblast	Hemtopoietic	Unsorted	Cancer Cells	Fibroblast	Hemtopoietic	Unsorted	Cancer Cells	Fibroblast	Hemtopoietic
alanine	M+0	0.8219	0.7518	0.8809	0.9322	0.8522	0.8308	0.9101	0.9401	0.8927	0.9022	0.927	1.0578	0.8716	0.8463	0.791874	0.9055	0.8485	0.7825	0.8322	0.8804
alanine	M+1	0.027	0.0268	0.0103	0.008	0.0234	0.0205	0.0092	0.0072	0.0196	0.0183	0.0193	-0.0137	0.0147	0.0236	0.0385844	0.0066	0.0246	0.0275	0.014	0.0108
alanine	M+2	0.0236	0.0312	0.0153	0.0093	0.021	0.0232	0.0127	0.006	0.0171	0.0084	-0.0014	-0.0417	0.0197	0.0205	-0.0120097	0.0092	0.0217	0.0279	0.0166	0.0056
alanine	M+3	0.1279	0.1907	0.0902	0.0475	0.1035	0.12	0.0613	0.0402	0.0734	0.0886	0.0713	-0.0049	0.0848	0.1029	0.181551	0.0386	0.1068	0.1194	0.0752	0.0496
aspartate	M+0	0.8629	0.832	0.9144	0.9572	0.8855	0.8851	0.9438	0.964	0.9089	0.909	0.9292	0.9826	0.8829	0.8717	0.9206	0.9451	0.8624	0.885	0.9114	0.9357
aspartate	M+1	0.0492	0.0456	0.0255	0.0137	0.0459	0.033	0.0155	0.0115	0.0304	0.031	0.037	0.053	0.034	0.0324	0.0343	0.02	0.0507	0.0306	0.0338	0.0238
aspartate	M+2	0.0487	0.0658	0.0343	0.0194	0.0409	0.0454	0.0262	0.0184	0.0344	0.0302	0.0322	-0.0142	0.0408	0.0427	0.0113	0.0182	0.0455	0.0371	0.0225	0.02
aspartate	M+3	0.0249	0.0361	0.0166	0.0063	0.0179	0.0231	0.0097	0.0037	0.0202	0.0283	0.0132	-0.0223	0.0304	0.0402	0.0322	0.0153	0.0256	0.0315	0.0256	0.0143
aspartate	M+4	0.0142	0.0206	0.0091	0.0033	0.0099	0.0133	0.0048	0.002	0.0068	0.0086	-0.0114	-0.0015	0.0121	0.0145	0.0037	0.0055	0.0158	0.0183	0.0083	0.0062
glutamate	M+0	0.7879	0.747	0.8538	0.9283	0.8252	0.8279	0.9011	0.9408	0.8497	0.8335	0.8872	1.0132	0.8419	0.8001	0.8459	0.9383	0.8025	0.8378	0.8715	0.8936
glutamate	M+1	0.0603	0.0584	0.0345	0.0191	0.0588	0.0416	0.0238	0.016	0.0438	0.0547	0.0283	-0.0078	0.0302	0.0325	0.0352	0.0042	0.0597	0.0347	0.0255	0.0254
glutamate	M+2	0.0763	0.0932	0.0551	0.0272	0.0641	0.0656	0.0355	0.0236	0.0573	0.0579	0.0573	0.0114	0.0609	0.078	0.0336	0.0257	0.0642	0.0521	0.0353	0.0318
glutamate	M+3	0.0411	0.0547	0.0316	0.016	0.0317	0.0386	0.0219	0.0123	0.0294	0.0359	0.0223	-0.0122	0.0362	0.0499	0.0422	0.0137	0.0382	0.0377	0.0305	0.0195
glutamate	M+4	0.0209	0.0283	0.0146	0.0048	0.012	0.014	0.0055	0.0028	0.0143	0.0147	0.0088	-0.0072	0.0171	0.018	-0.0168	0.0041	0.0203	0.0193	0.0151	0.0082
glutamate	M+5	0.0134	0.018	0.0095	0.0033	0.0081	0.0098	0.0042	0.0021	0.0061	0.0078	-0.0022	0.0023	0.0093	0.0135	-0.0042	-0.0032	0.0152	0.0156	0.0122	0.0057
glycine	M+0	0.9714	0.978	0.9944	0.9948	0.9768	0.9925	0.9973	0.9955	0.9807	1.0059	1.0076	1.1839	0.979	0.9551	0.8938	0.9612	0.9682	0.9616	0.9235	0.9711
glycine	M+1	0.0134	0.0057	-0.0027	-0.0028	0.01	-0.0031	-0.0015	-0.0055	0.007	0.0005	0.0023	-0.1151	0.0022	0.0187	0.0505	0.0093	0.0124	0.0154	0.0211	0.0098
glycine	M+2	0.016	0.0164	0.0083	0.0083	0.0138	0.011	0.0074	0.0113	0.0133	0.0051	-0.0049	-0.0828	0.0155	0.0061	0.0241	0.0154	0.0202	0.0093	0.0192	0.0133
proline	M+0	0.9621	0.9655	0.9897	1.0023	0.97	0.9973	1.0025	1.0108	0.9904	0.9833	0.9772	0.9908	0.9724	0.9817	0.094	1.0219	0.9484	1.007	0.9897	0.9944
proline	M+1	-0.0012	-0.0057	-0.0159	-0.0195	-0.0024	-0.02	-0.0235	-0.0238	-0.0151	-0.0061	-0.0136	-0.0224	-0.0109	-0.0165	0.5379	-0.0375	0.0078	-0.0323	-0.0432	-0.0198
proline	M+2	0.0256	0.0242	0.0158	0.0114	0.0229	0.0136	0.0123	0.0086	0.0175	0.0209	0.0308	0.0477	0.0131	0.0075	-0.0198	0.0088	0.0251	0.0107	0.0121	0.0129
proline	M+3	0.0052	0.0073	0.0053	0.0031	0.004	0.0048	0.0047	0.0024	0.0052	0.0068	0.0129	-0.0129	0.0058	0.0035	-0.0072	-0.0028	0.0082	0.0052	0.0148	0.0066
proline	M+4	0.0037	0.0046	0.0026	0.0012	0.0024	0.0019	0.0018	0.001	0.0017	-0.0055	-0.0074	-0.0044	0.0068	0.0112	-0.001	0.0072	0.0055	0.0081	0.0064	0.004
proline	M+5	0.0018	0.0024	0.0013	0.0005	0.0012	0.001	0.0006	0.0001	0.0004	-0.0001	-0.0003	0.0012	0.0033	0.0026	-0.0004	-0.0019	0.0032	0.0021	0.0065	0.0021
serine	M+0	0.9302	0.9279	0.9696	0.9808	0.9384	0.9594	0.9861	0.9827	0.9637	0.9762	0.9891	1.0265	0.9634	0.94	0.9797	0.9794	0.9198	0.9551	0.933	0.9619
serine	M+1	0.0276	0.0192	0.003	-0.0018	0.0284	0.011	-0.0042	-0.005	0.0164	0.0023	0.0102	-0.0058	0.0101	0.0292	0.0036	0.0093	0.0388	0.018	0.0385	0.0083
serine	M+2	0.0155	0.0138	0.0073	0.008	0.0177	0.0138	0.0075	0.0096	0.0058	0.0232	0.0112	0.005	0.0107	0.0151	0.0261	0.0054	0.0188	0.0157	0.0179	0.008
serine	M+3	0.0269	0.0395	0.0205	0.0136	0.0158	0.0163	0.0107	0.0129	0.0152	0.0071	-0.0031	-0.0276	0.0167	0.0219	0.001	0.0111	0.0237	0.0165	0.0157	0.0238
