# Supplementary material for: Dissecting cell-type-specific metabolism in pancreatic ductal adenocarcinoma
Source: eLife journal article supplement (doi:10.7554/elife.56782), 2020-07-10
Supplement: supp [file elife-56782-supp-v1.zip › elife_poa_e56782_Supplementary_file_1.xlsx]

## Sheet: Sheet1
qPCR primers
Gene	Forward	Reverse
18S	CGC TTC CTT ACC TGG TTG AT	GAG CGA CCA AAG GAA CCA TA
36B4	TCC AGG CTT TGG GCA TCA	CTT TAT CAG CTG CAC ATC ACT CAG A
a-sma	TCC CTG GAG AAG AGC TAC GAA	TAT AGG TGG TTT CGT GGA TGC C
CD3ε	ATG CGG TGG AAC ACT TTC TGG	GCA CGT CAA CTC TAC ACT GGT
E-cadherin	GCT CTC ATC ATC GCC ACA G	GAT GGG AGC GTT GTC ATT G
F4/80	TGA CTC ACC TTG TGG TCC TAA	CTT CCC AGA ATC CAG TCT TTC C
malic enzyme 1	TGT GGG AAC AGA AAA TGA GGA GTT	TCA TCC AGG AAG GCG TCA TAC T
p53	CTC TCC CCC GCA AAA GAA AAA	CGG AAC ATC TCG AAG CGT TTA
pyruvate carboxylase	GGG ATG CCC ACC AGT CAC T	CAT AGG GCG CAA TCT TTT TGA
tdTomato	AGC AAG GGC GAG GAG GTC ATC	CCT TGG AGC CGT ACA TGA ACT GG
vimentin	GTA CCG GAG ACA GGT GCA GT	TTC TCT TCC ATC TCA CGC ATC
