# Supplementary figures and images for: Dissecting cell-type-specific metabolism in pancreatic ductal adenocarcinoma
Source: eLife journal article supplement (doi:10.7554/elife.56782), 2020-07-10

Figure 2- figure supplement 1

**A**

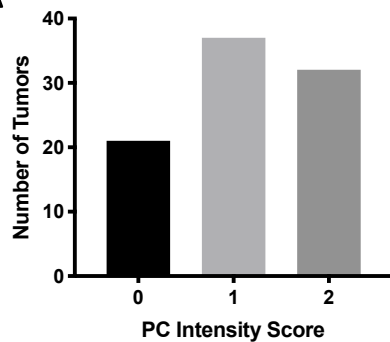

**B**

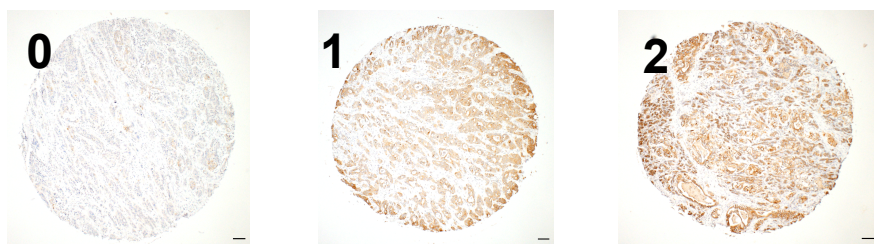

**C**

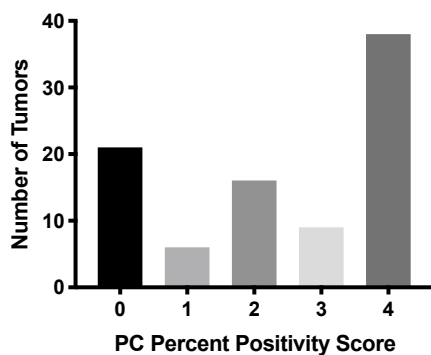

**D**

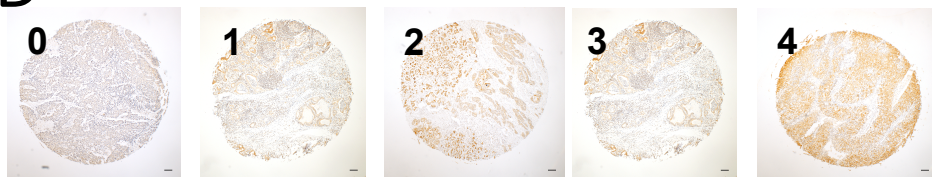

**E**

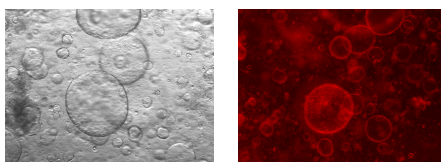

**F**

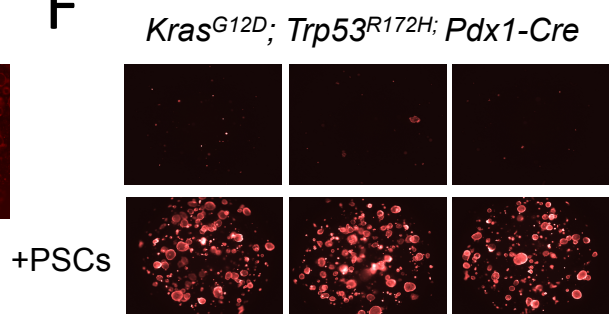

**G**

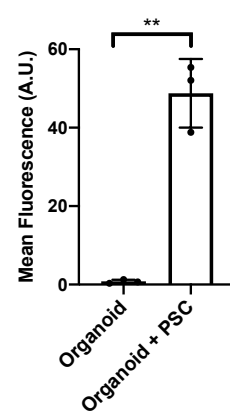

**H**

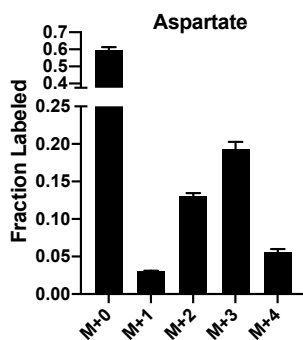

**I**

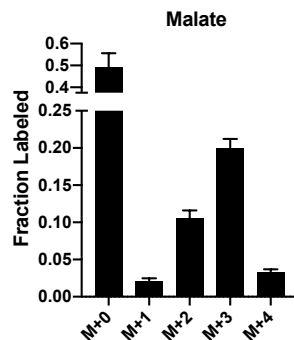

**J**

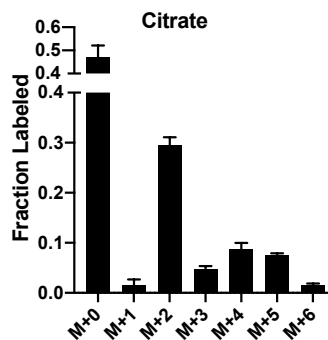

**K**

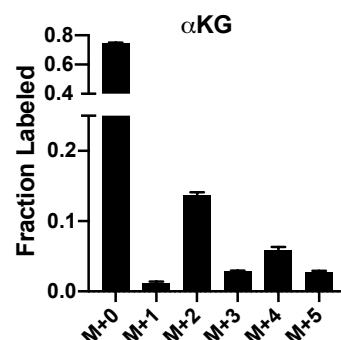

Supplement: supp [file elife-56782-supp-v1.zip]

Figure 5- figure supplement 1

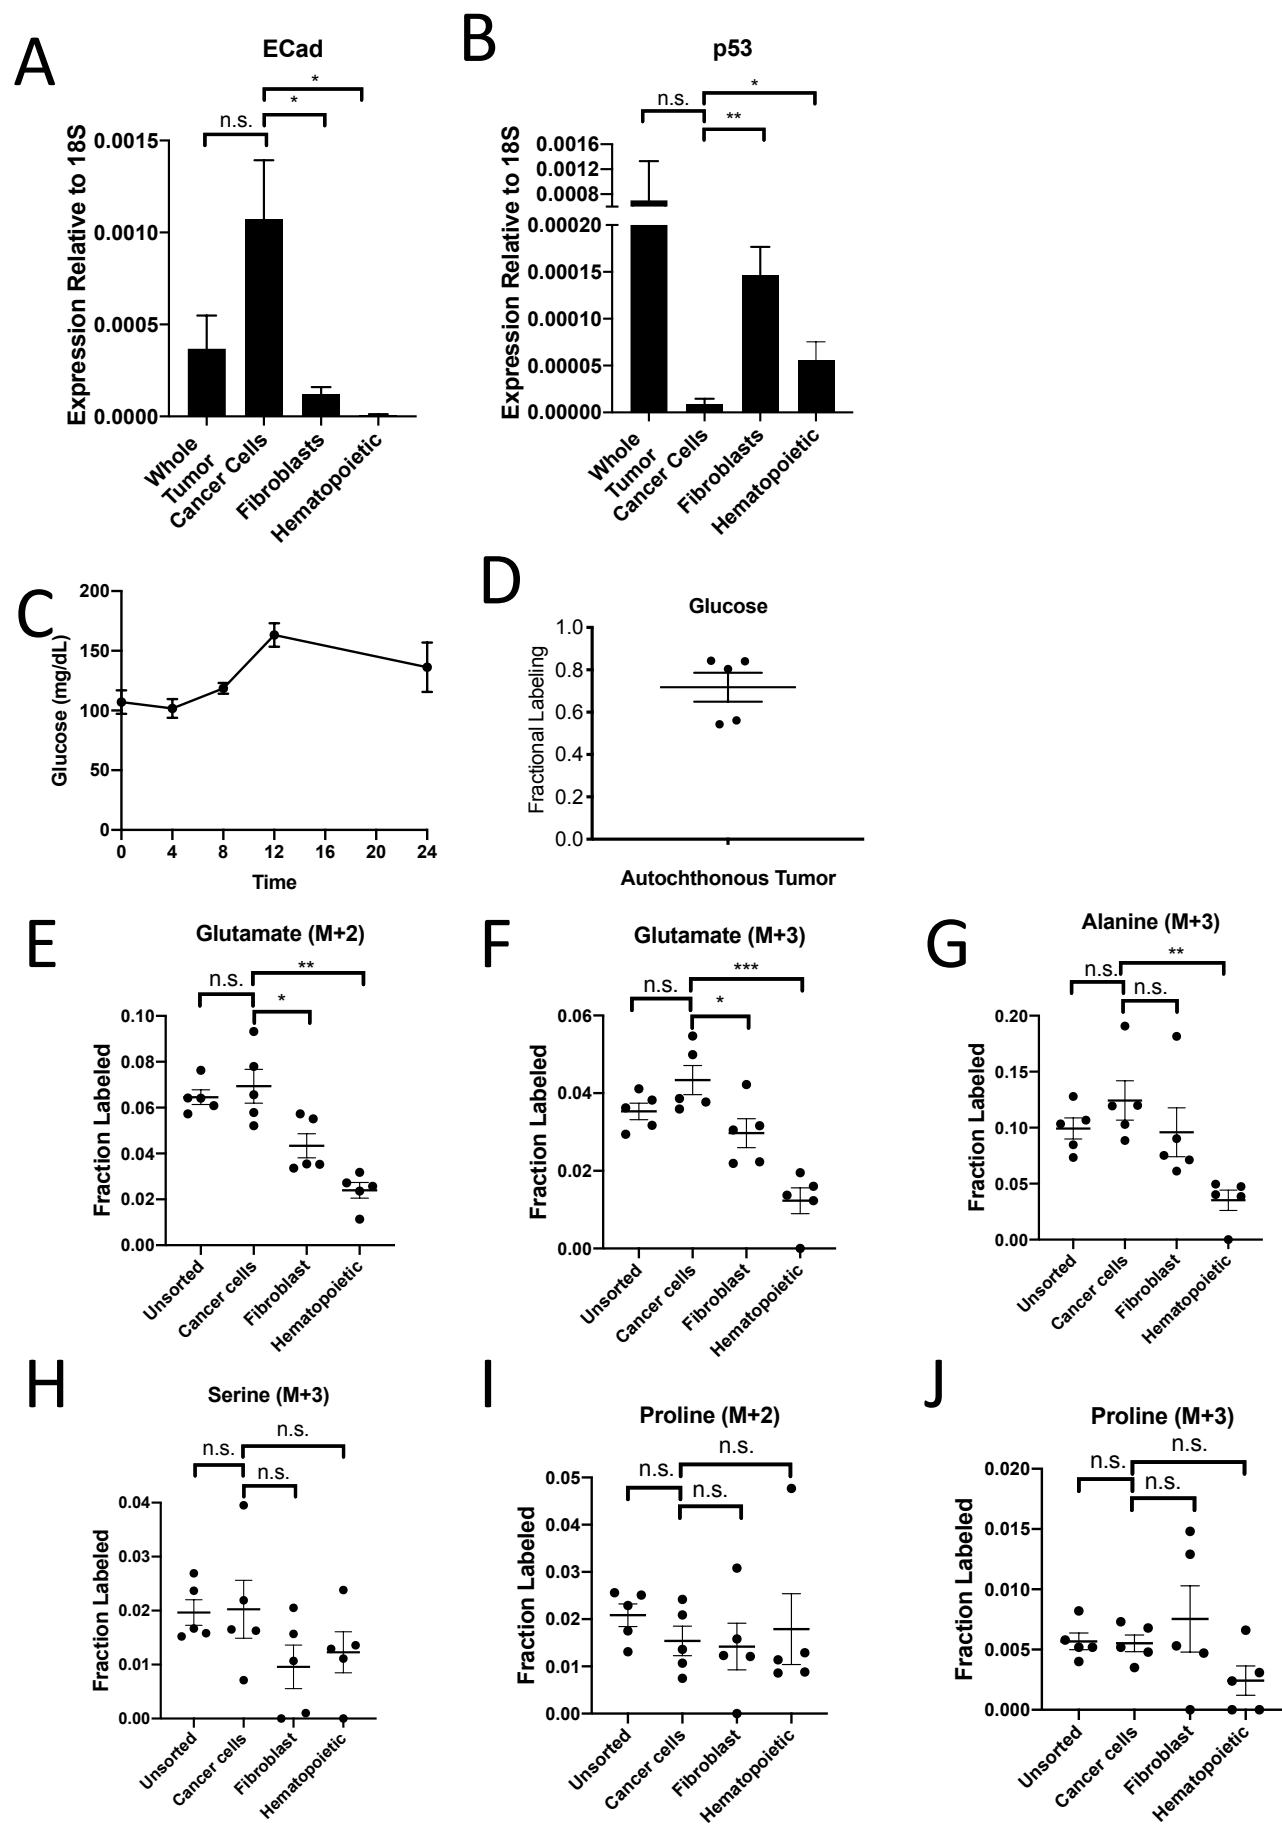

Supplement: supp [file elife-56782-supp-v1.zip]

Figure 1- figure supplement 1

A

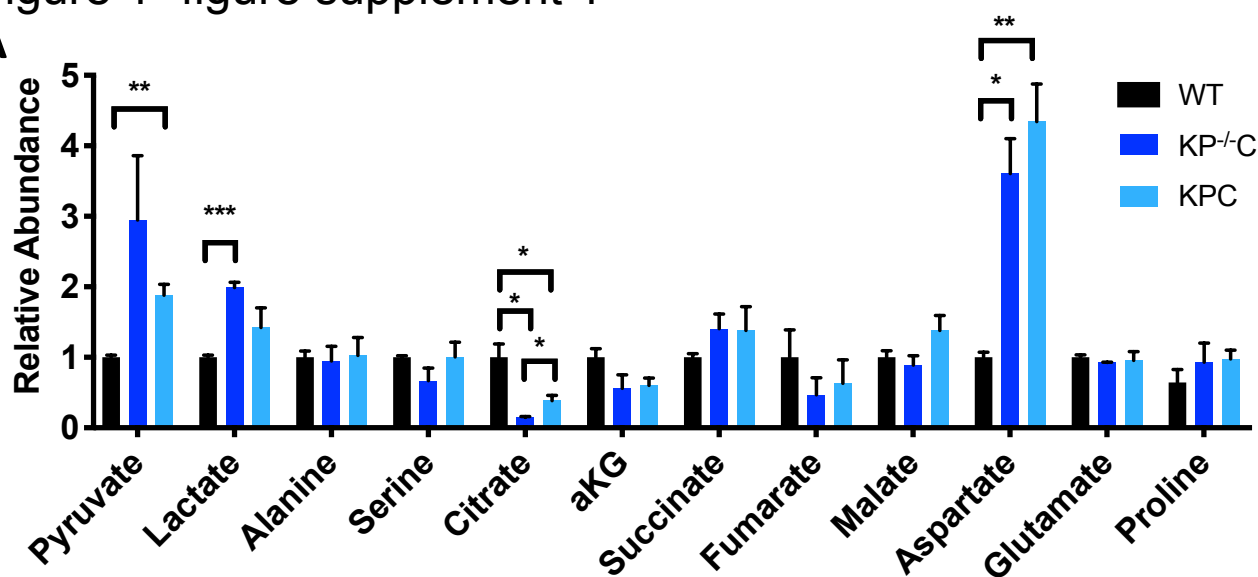

Plasma

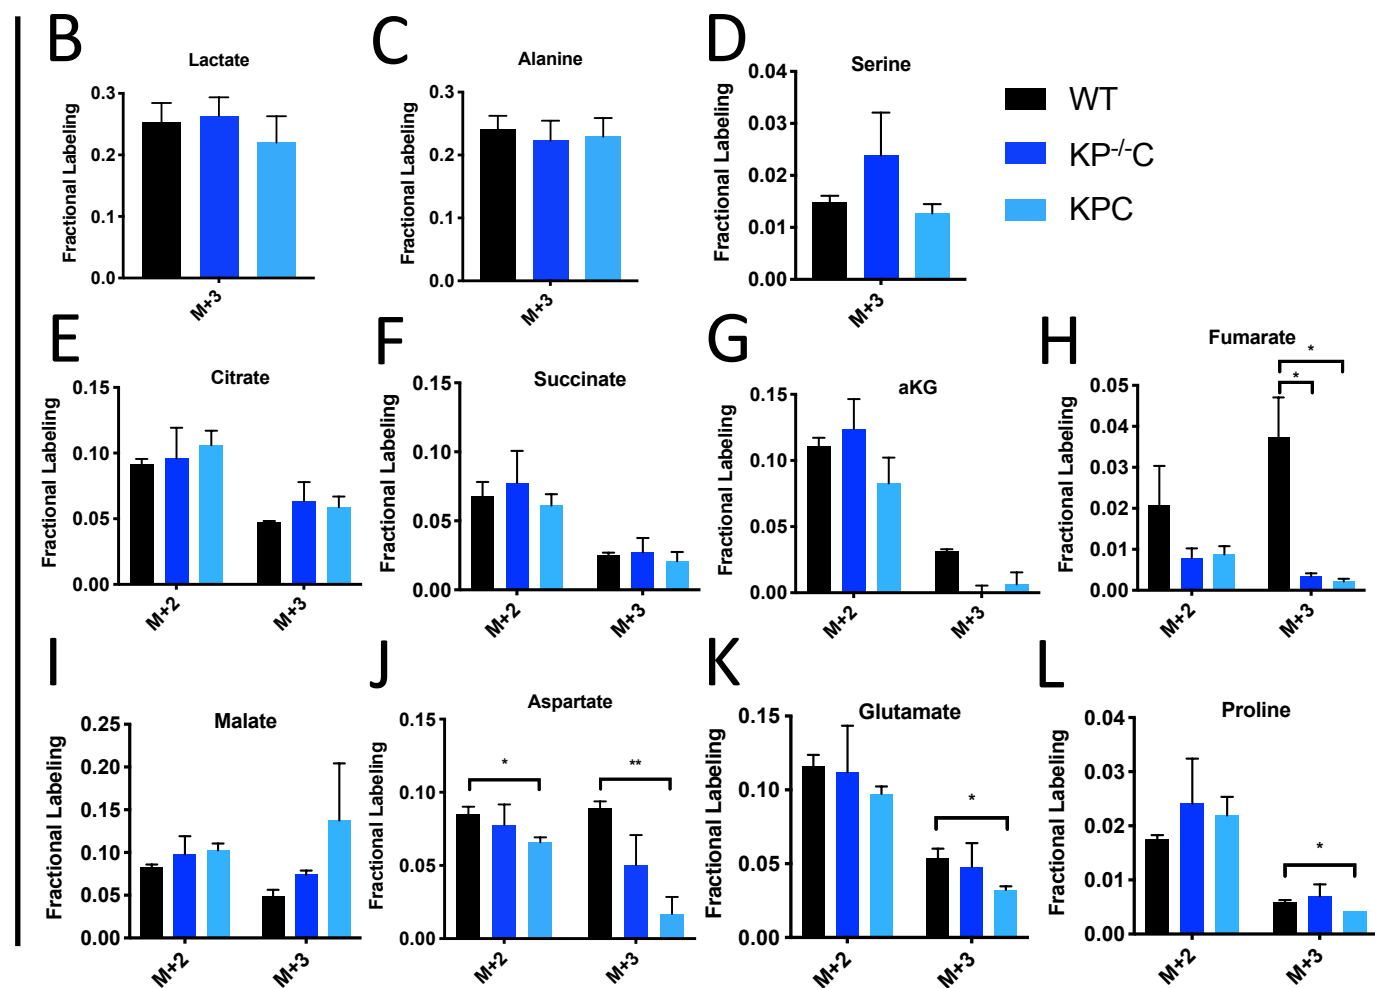

Supplement: supp [file elife-56782-supp-v1.zip › elife_poa_e56782_Figure_1_figure_supplement_1.pdf]

Figure 1- figure supplement 2

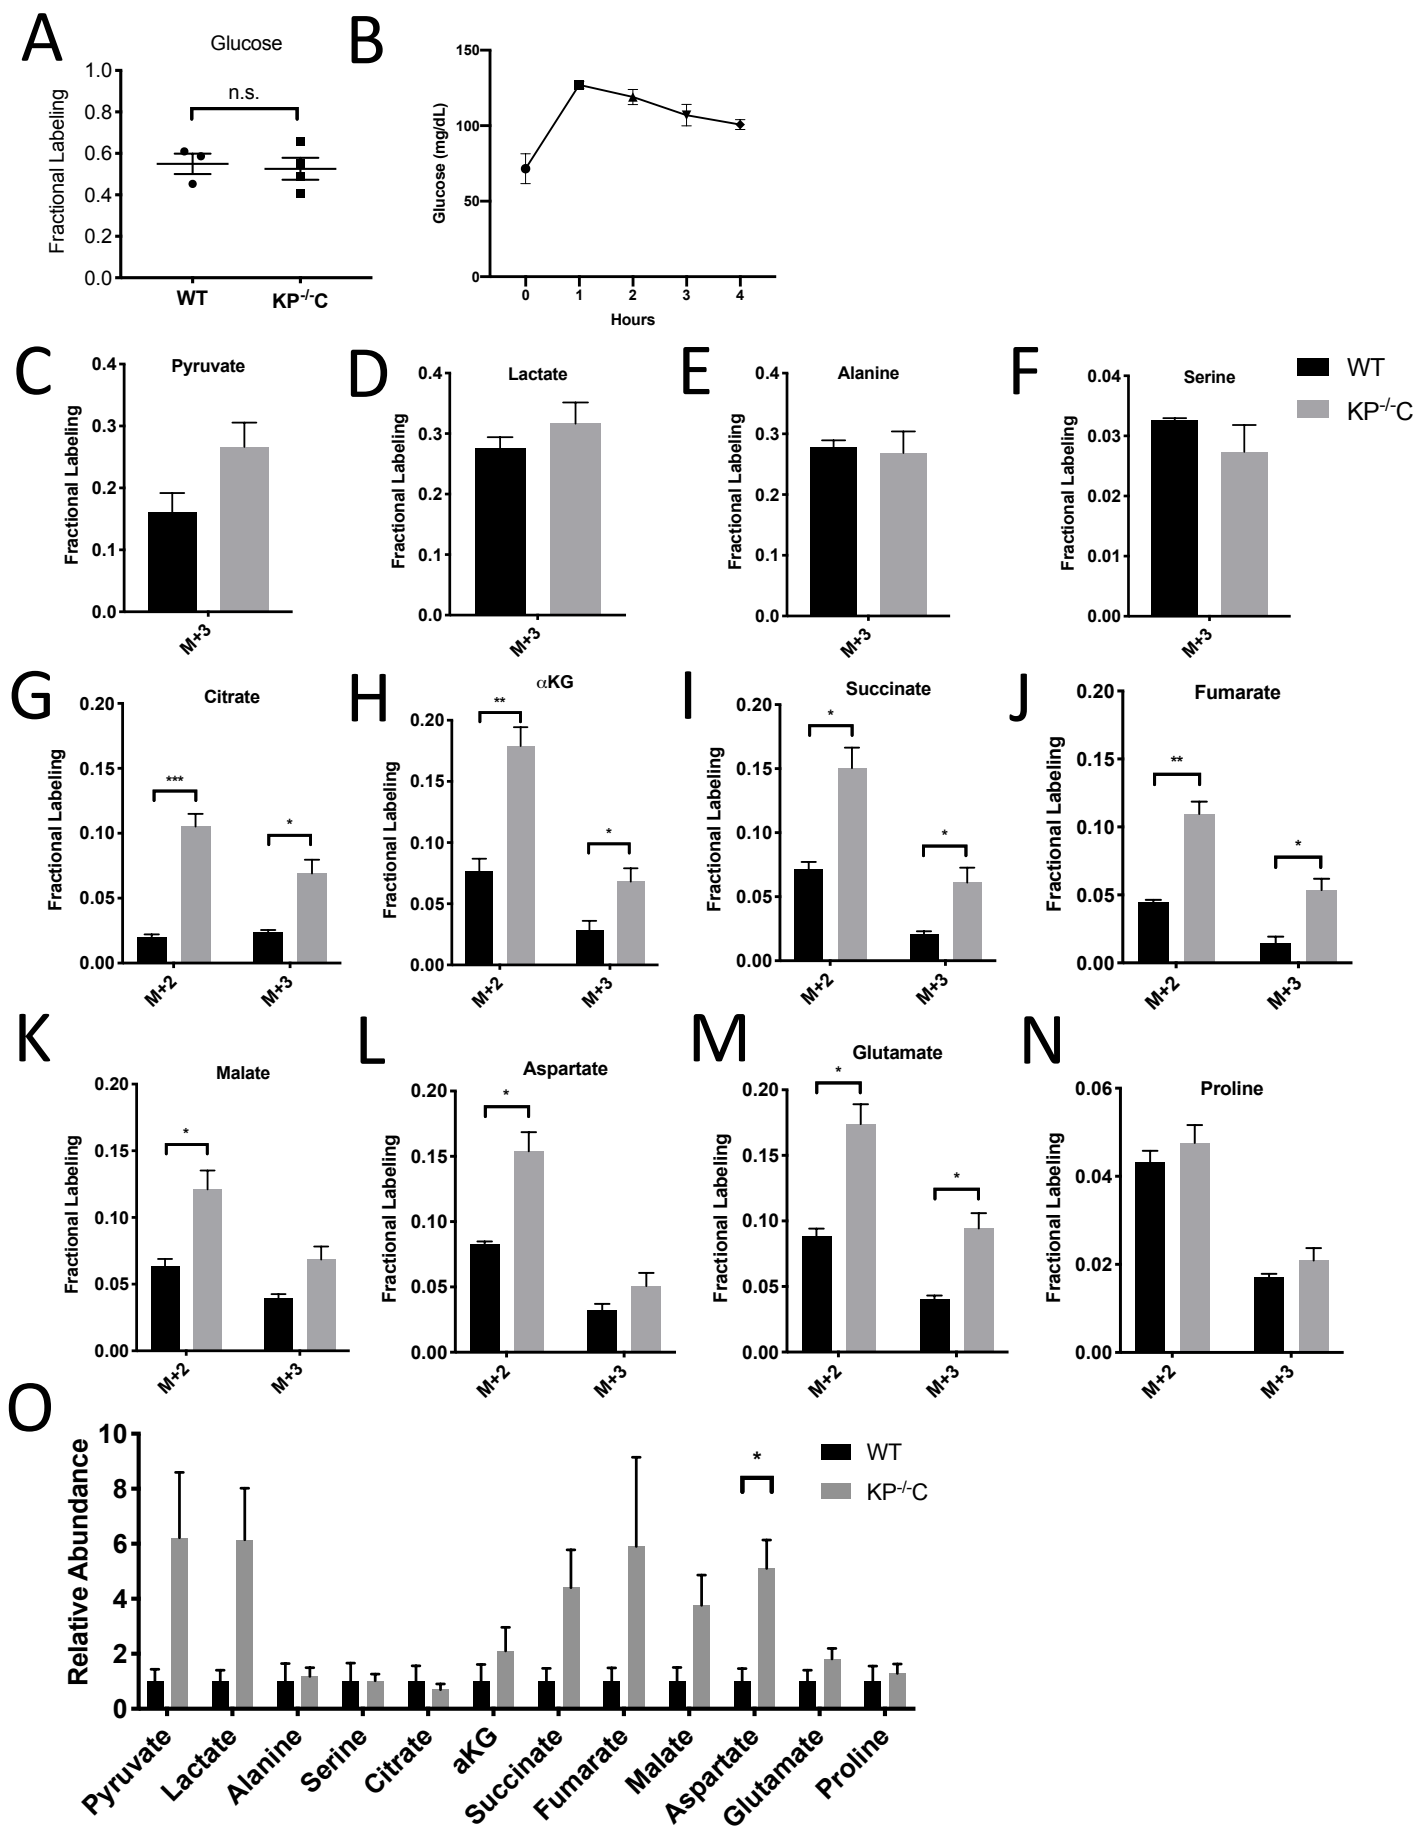

Supplement: supp [file elife-56782-supp-v1.zip › elife_poa_e56782_Figure_1_figure_supplement_2.pdf]

Figure 1- figure supplement 3

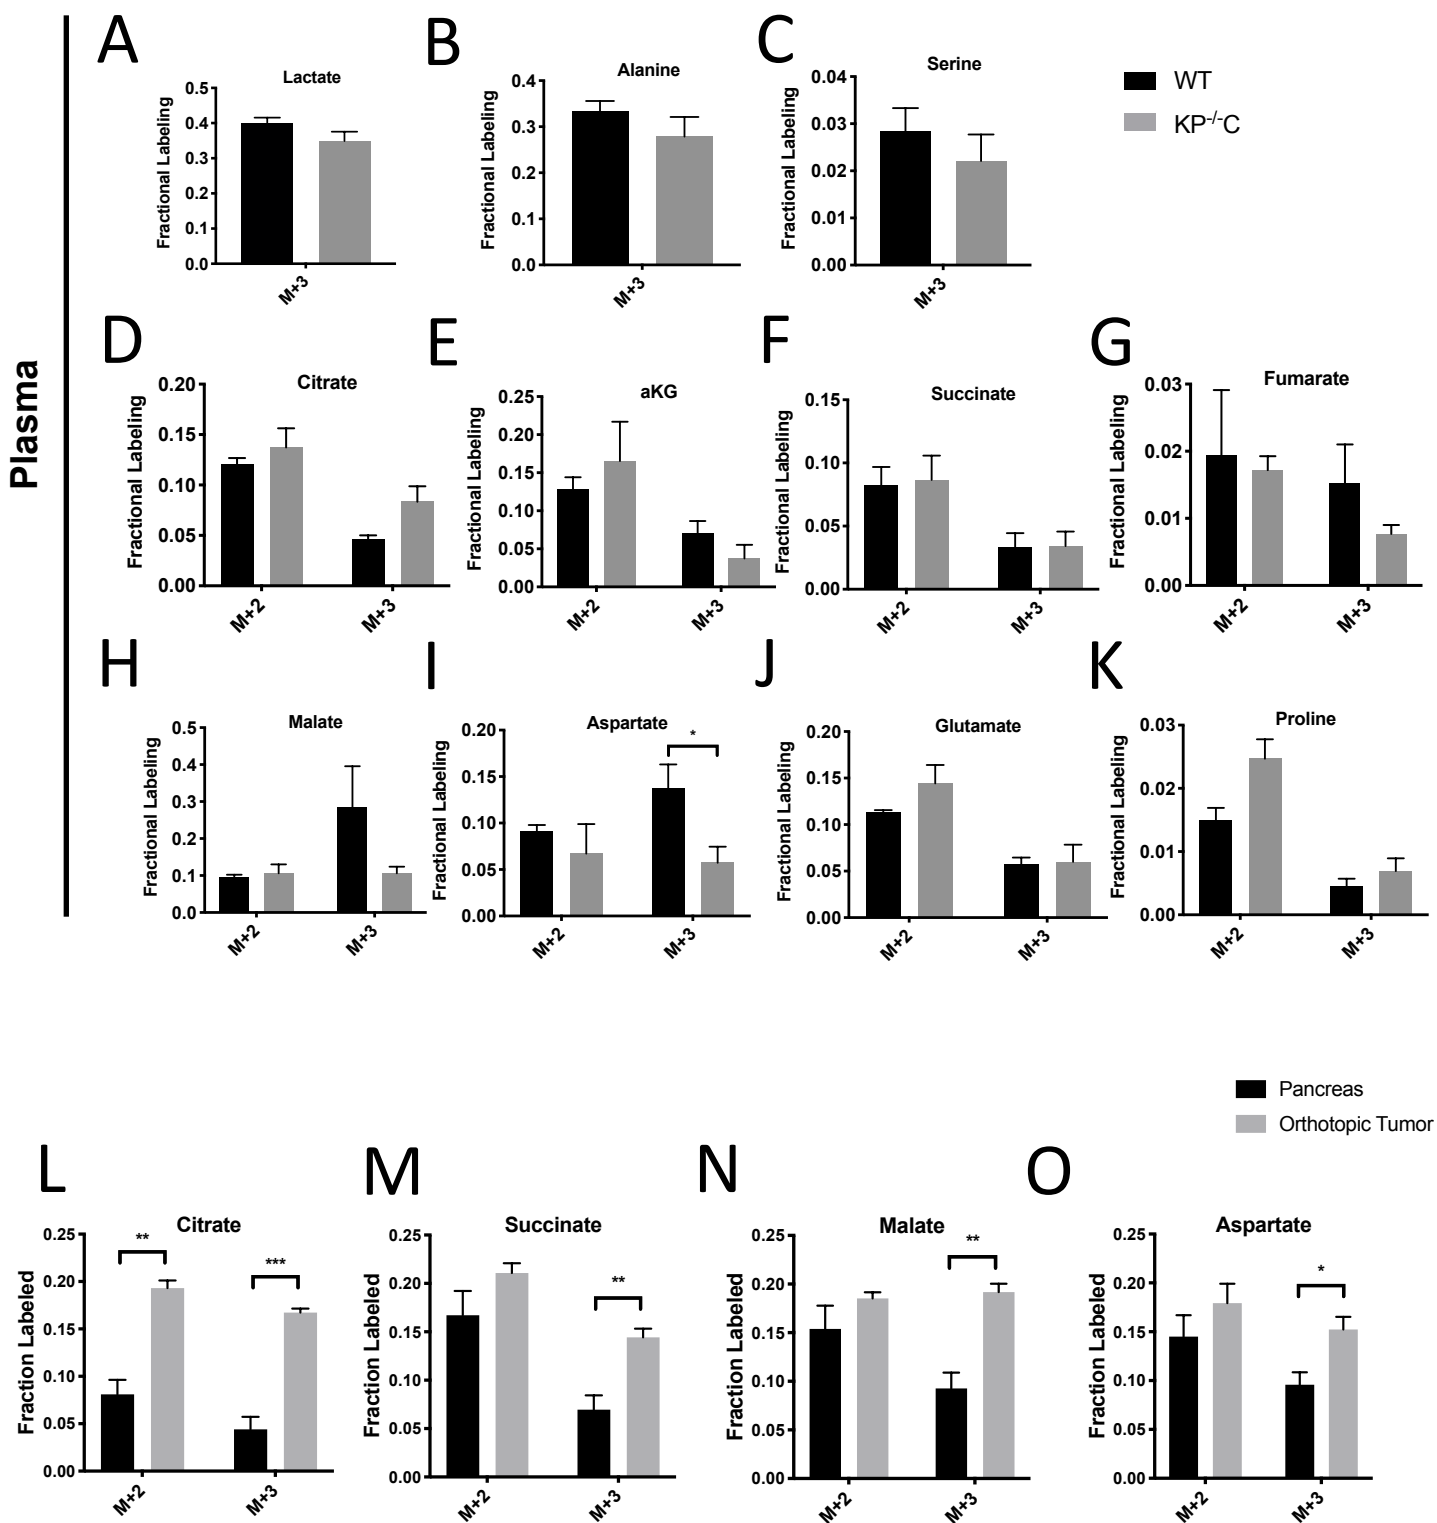

Supplement: supp [file elife-56782-supp-v1.zip › elife_poa_e56782_Figure_1_figure_supplement_3.pdf]

Figure 3- figure supplement 1

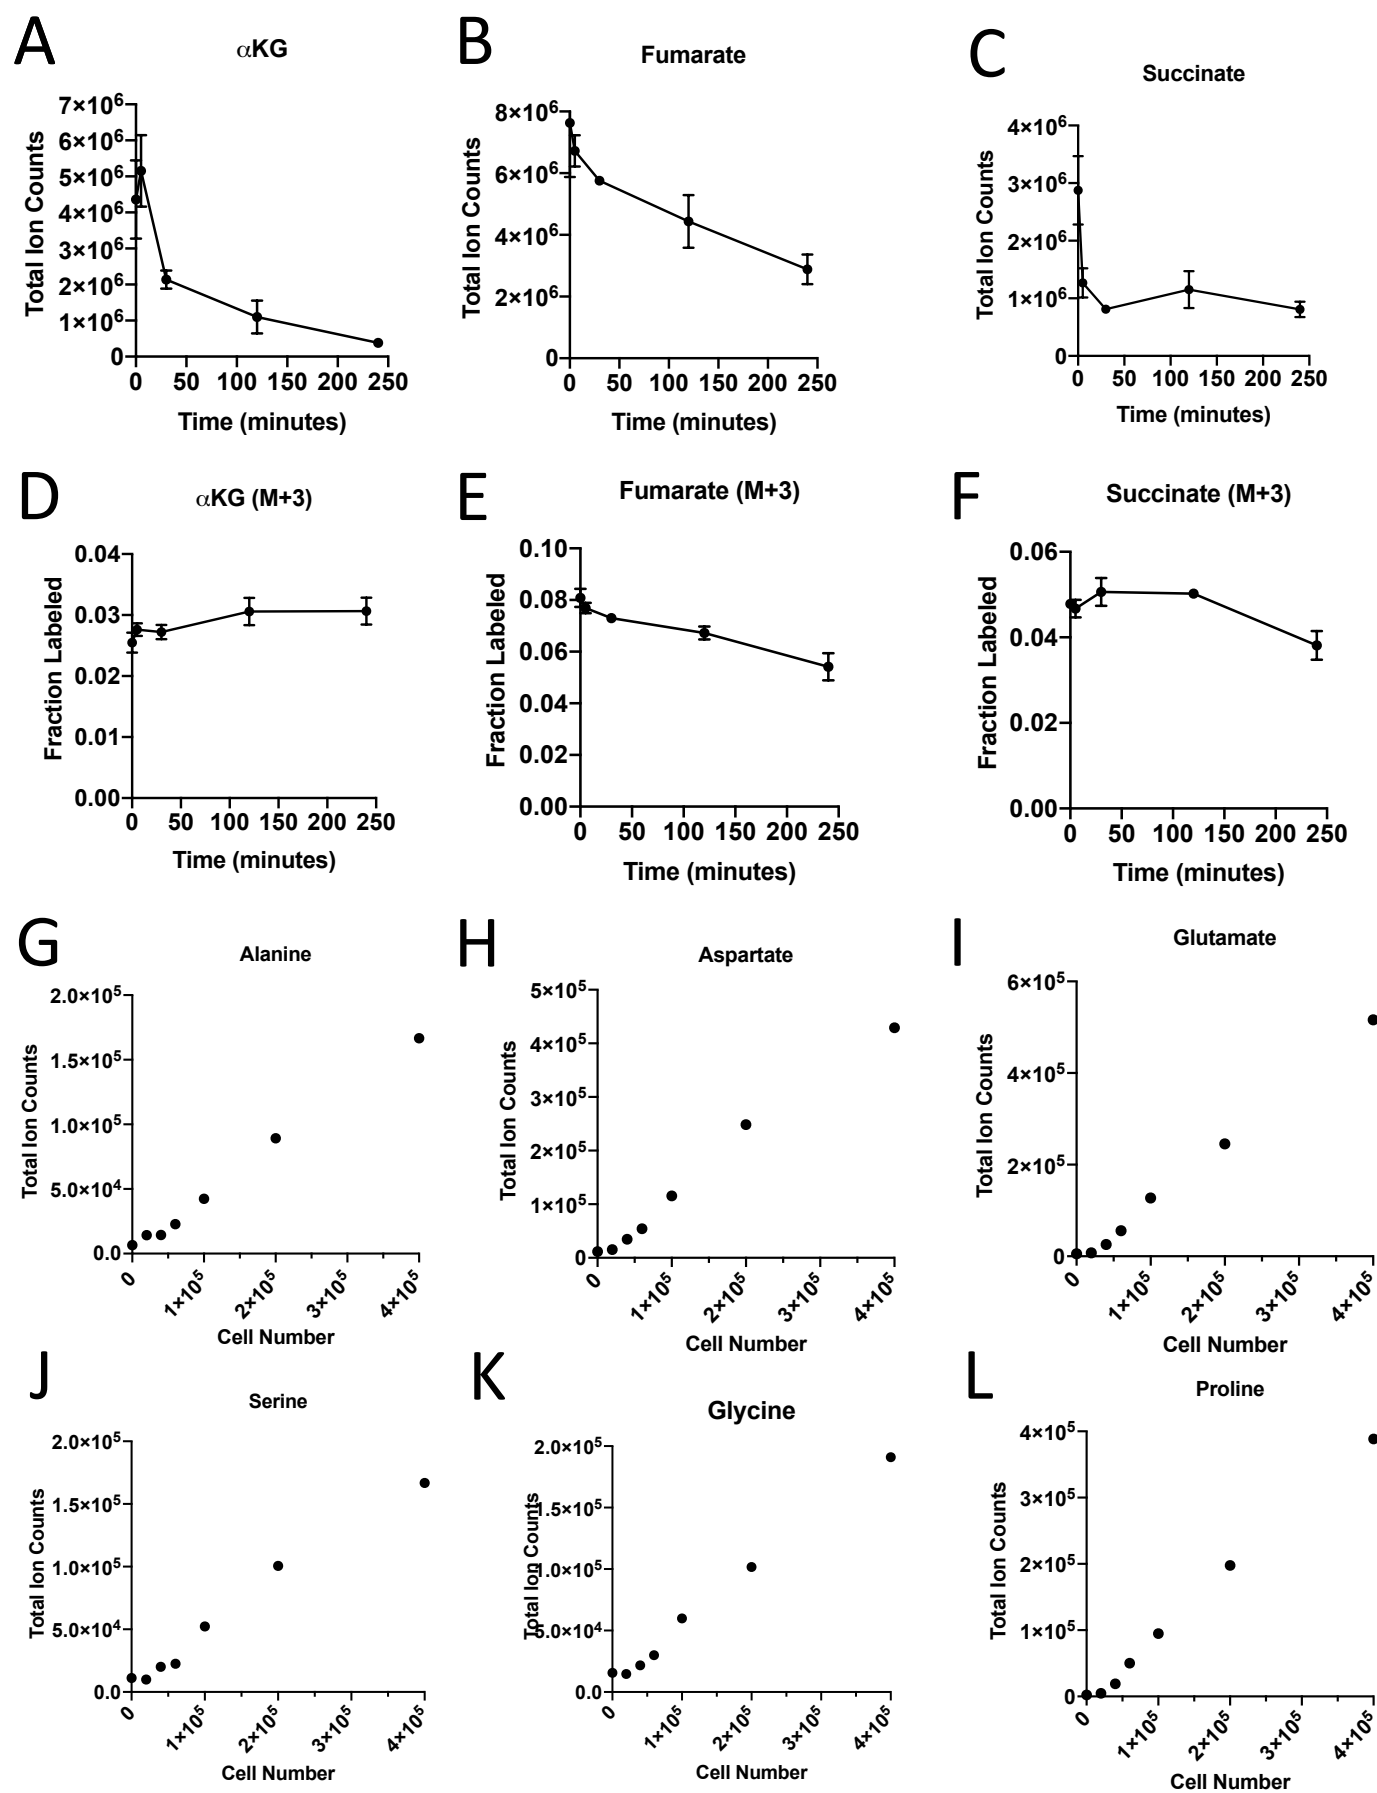

Supplement: supp [file elife-56782-supp-v1.zip › elife_poa_e56782_Figure_3_figure_supplement_1.pdf]

Figure 4- figure supplement 1

A

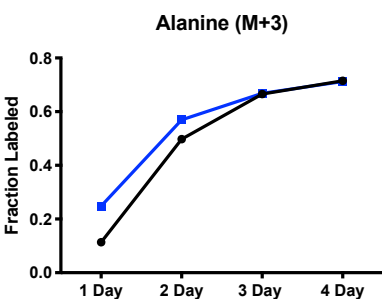

B

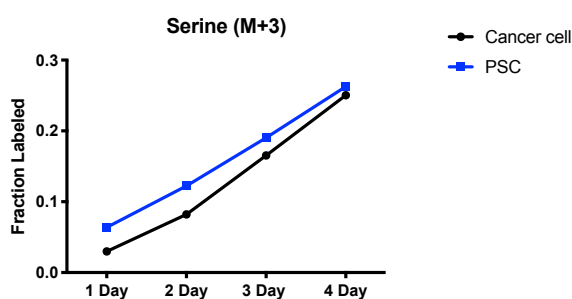

C

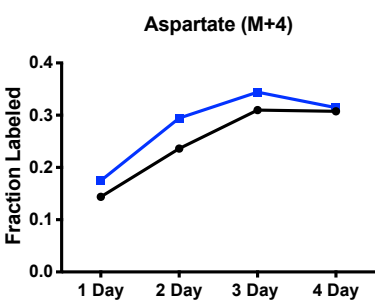

D

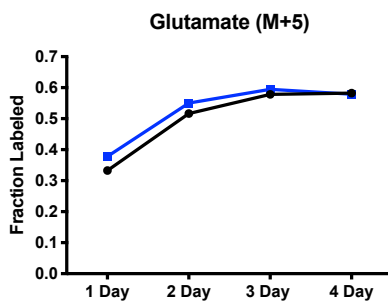

E

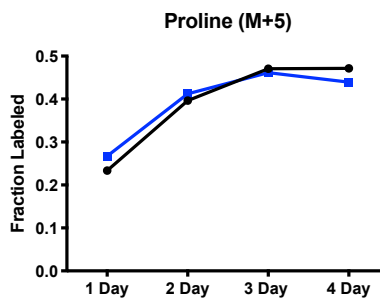

F

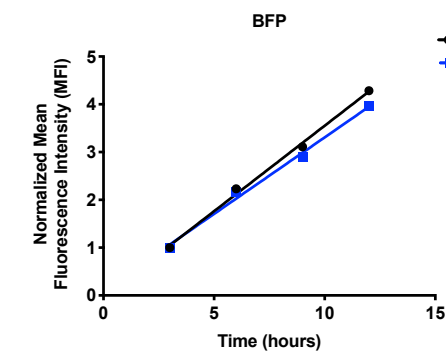

G

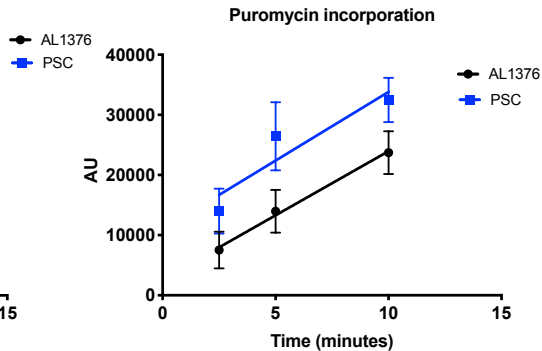

H

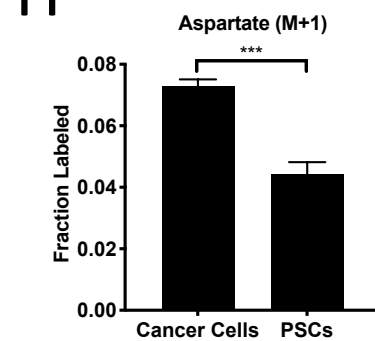

Supplement: supp [file elife-56782-supp-v1.zip › elife_poa_e56782_Figure_4_figure_supplement_1.pdf]

Figure 6- figure supplement 1

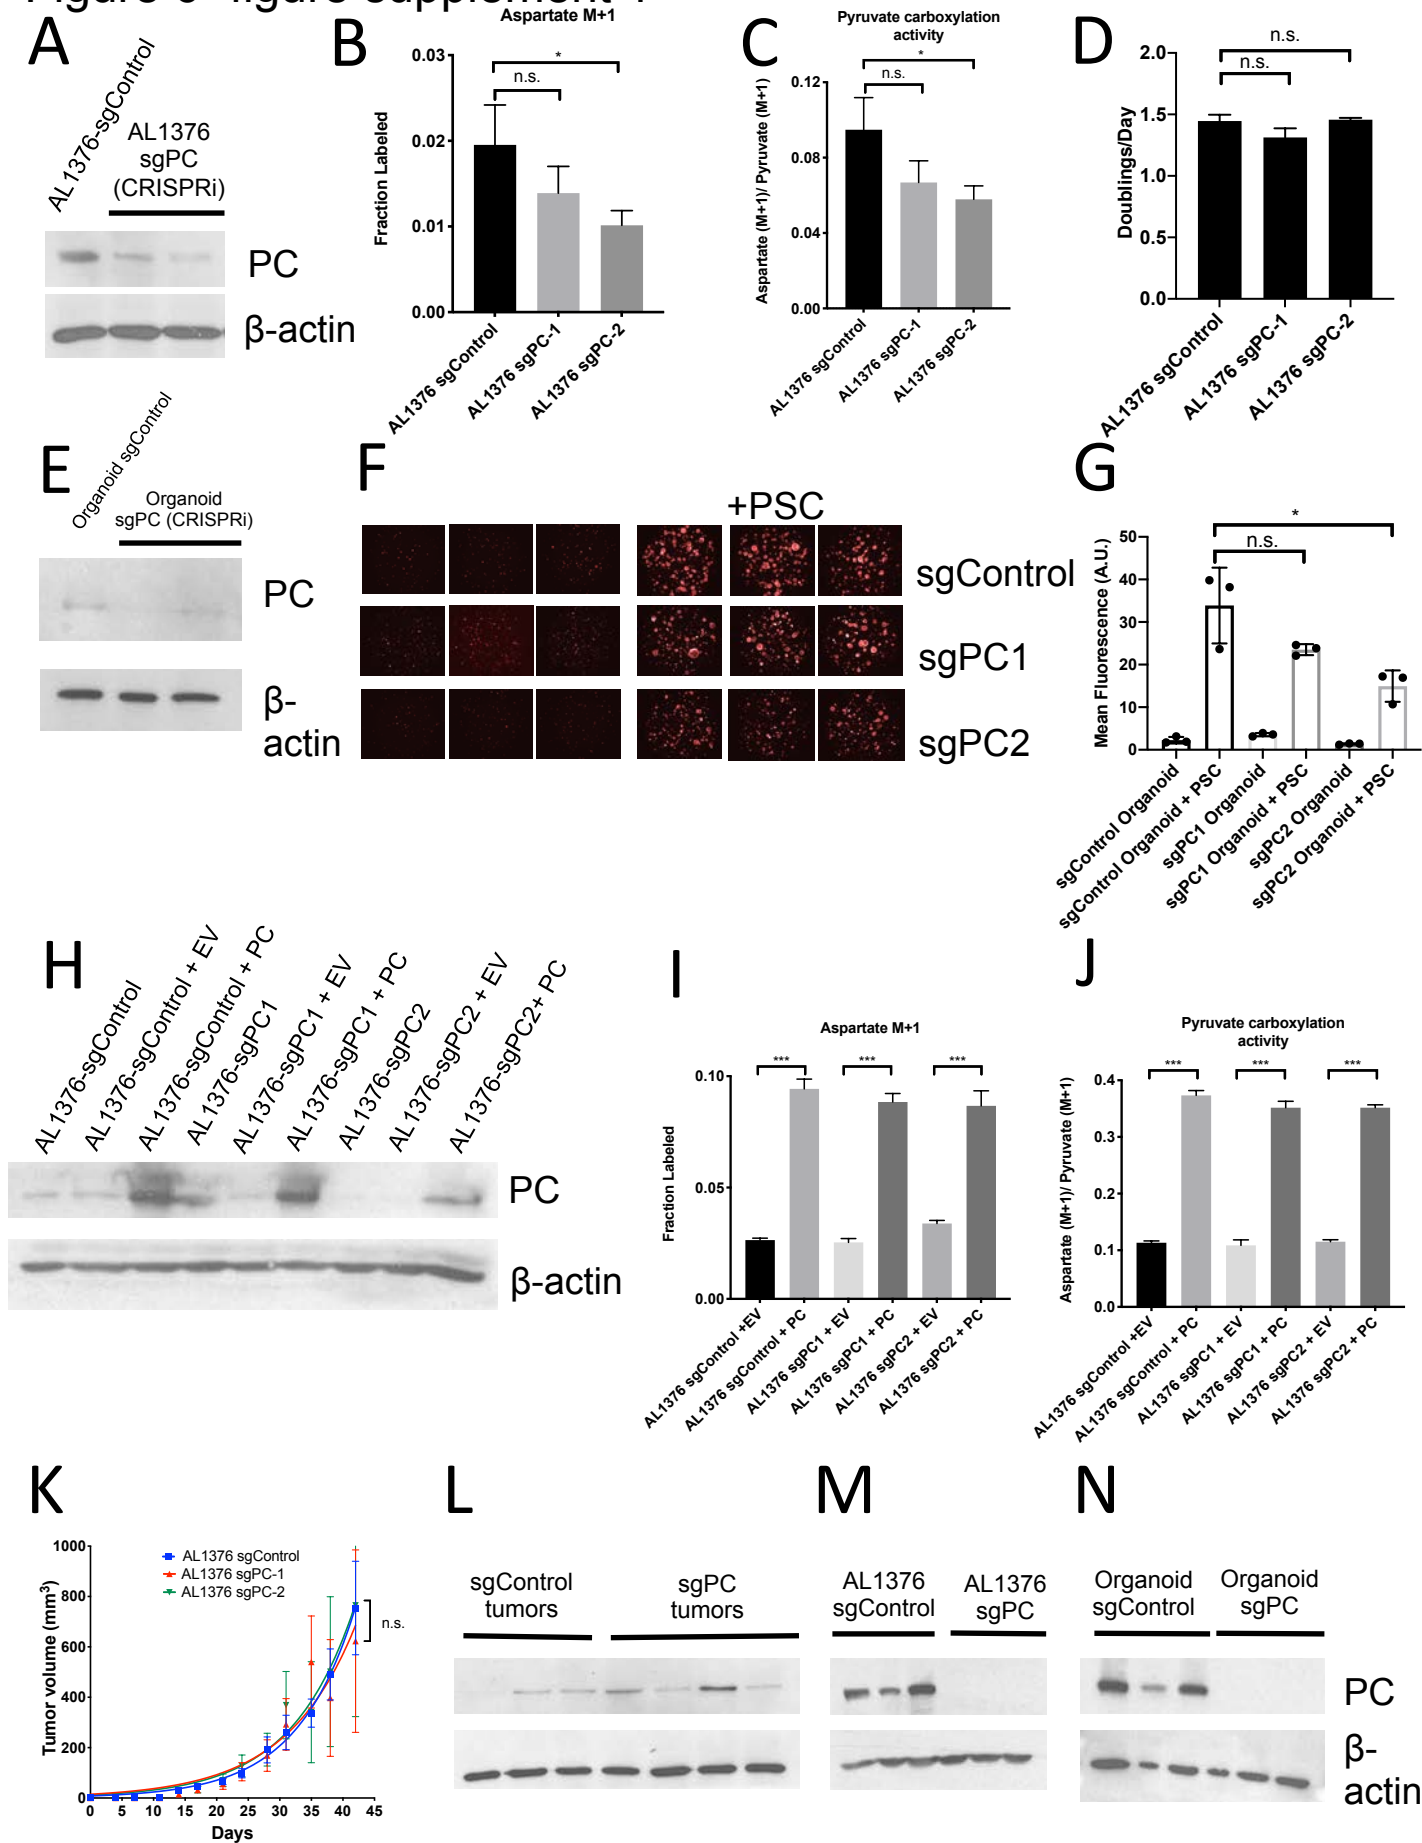

Supplement: supp [file elife-56782-supp-v1.zip › elife_poa_e56782_Figure_6_figure_supplement_1.pdf]

Figure 6- figure supplement 2

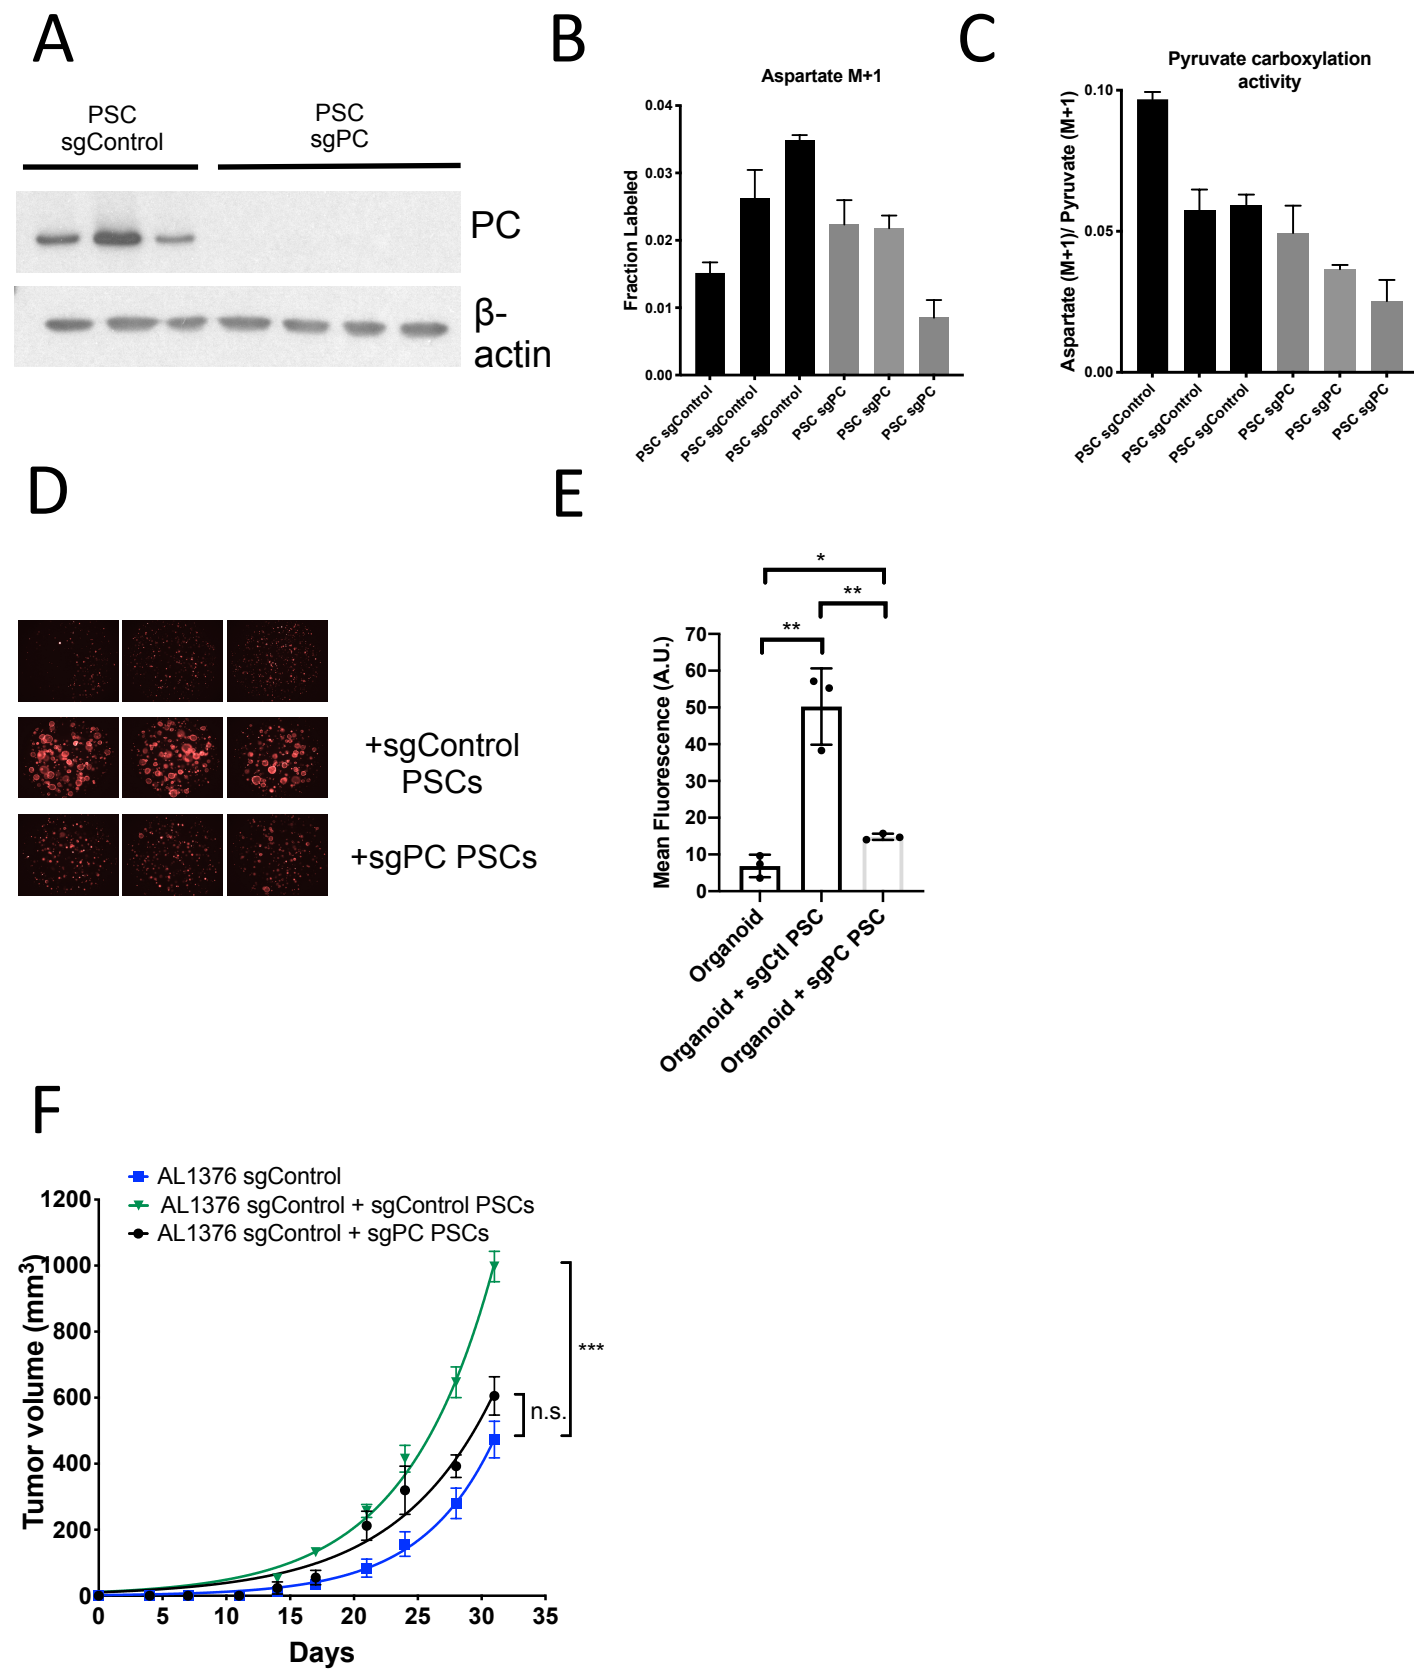

Supplement: supp [file elife-56782-supp-v1.zip › elife_poa_e56782_Figure_6_figure_supplement_2.pdf]

Figure 7- figure supplement 1

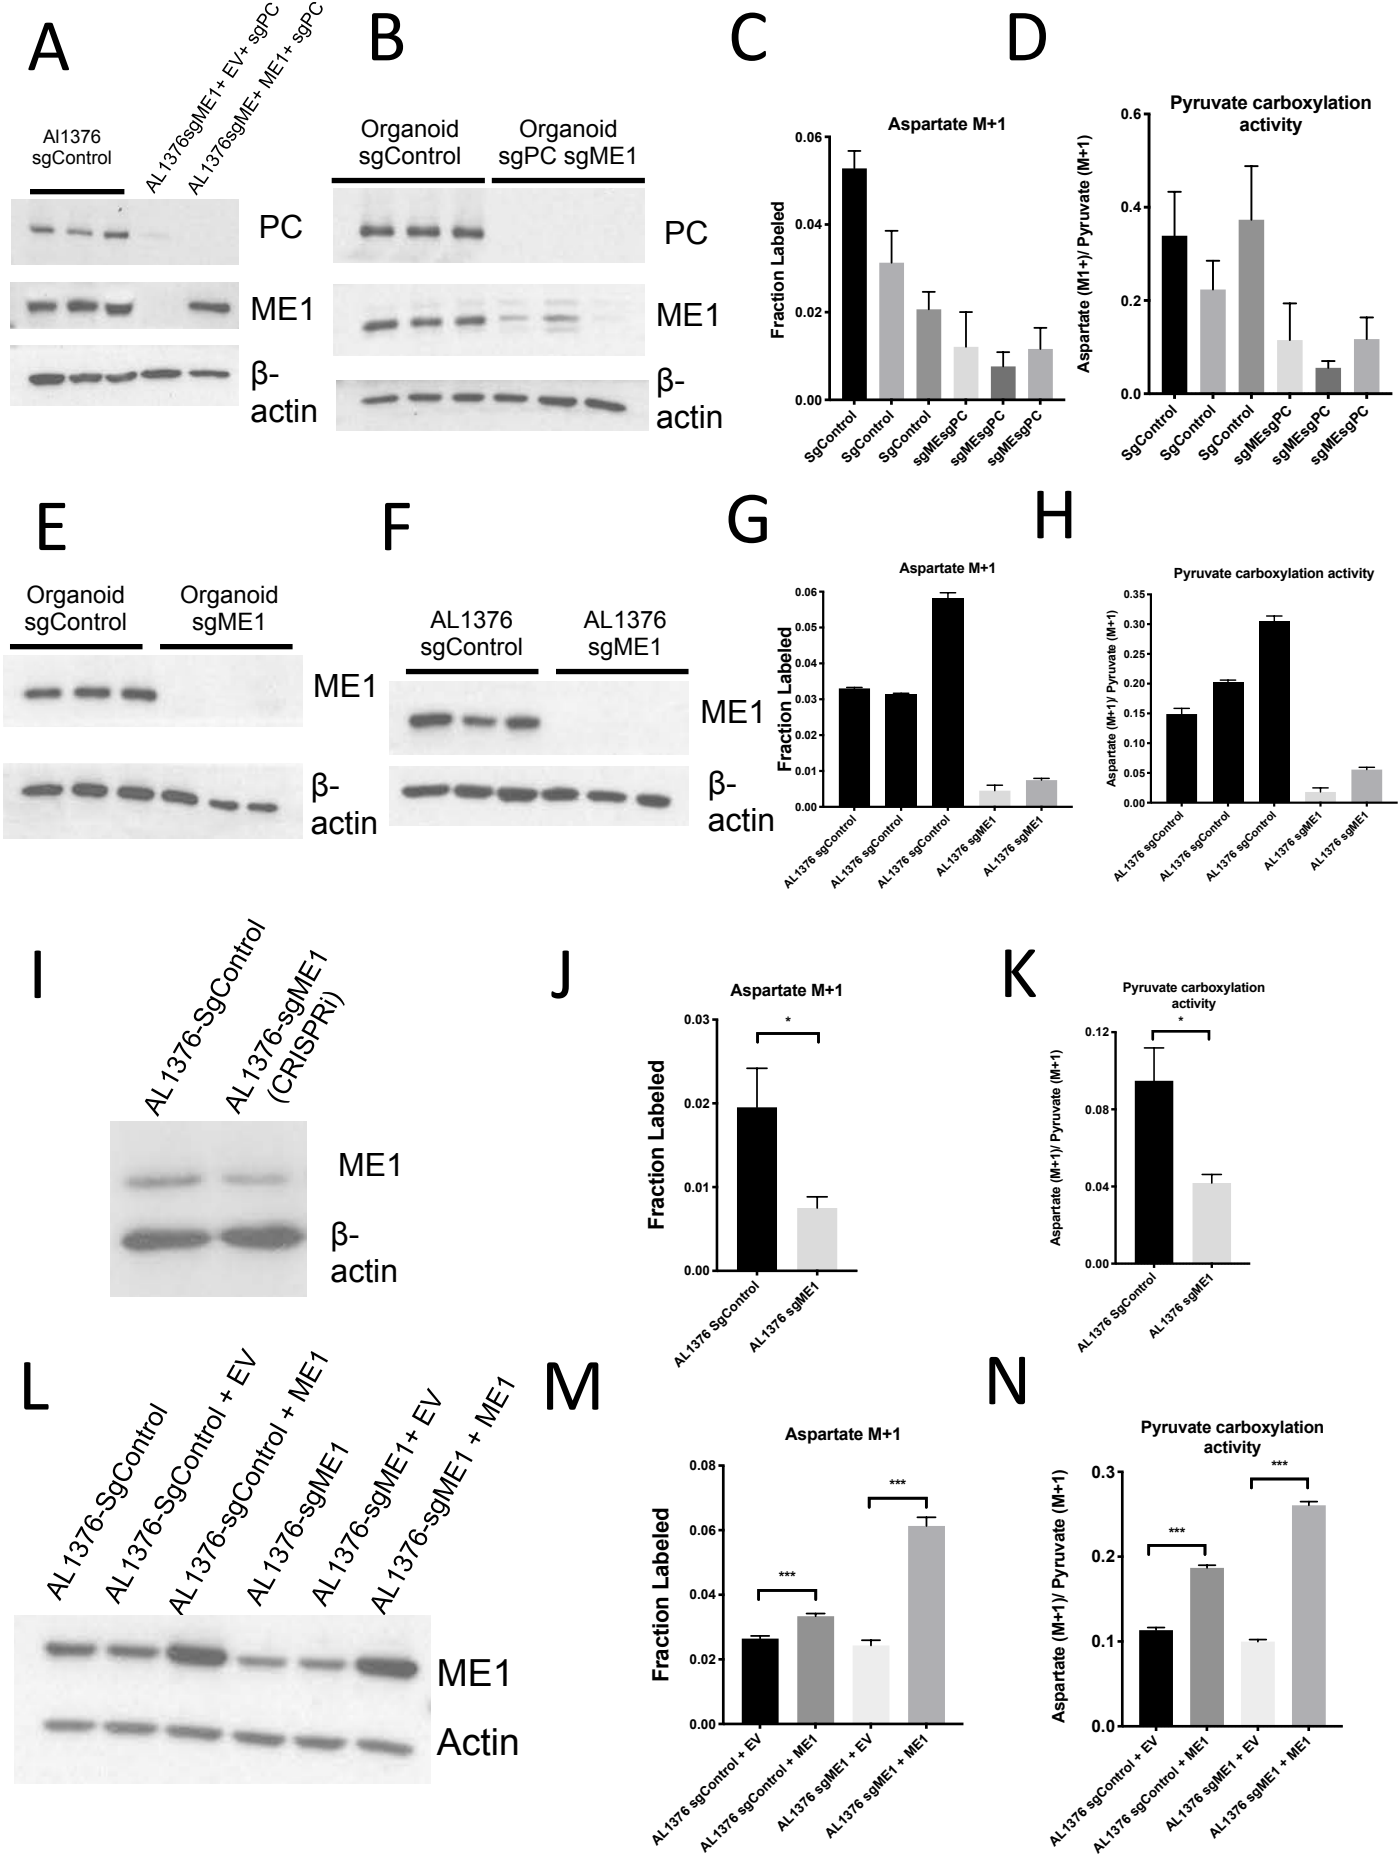

Supplement: supp [file elife-56782-supp-v1.zip › elife_poa_e56782_Figure_7_figure_supplement_1.pdf]

Figure 7- figure supplement 2

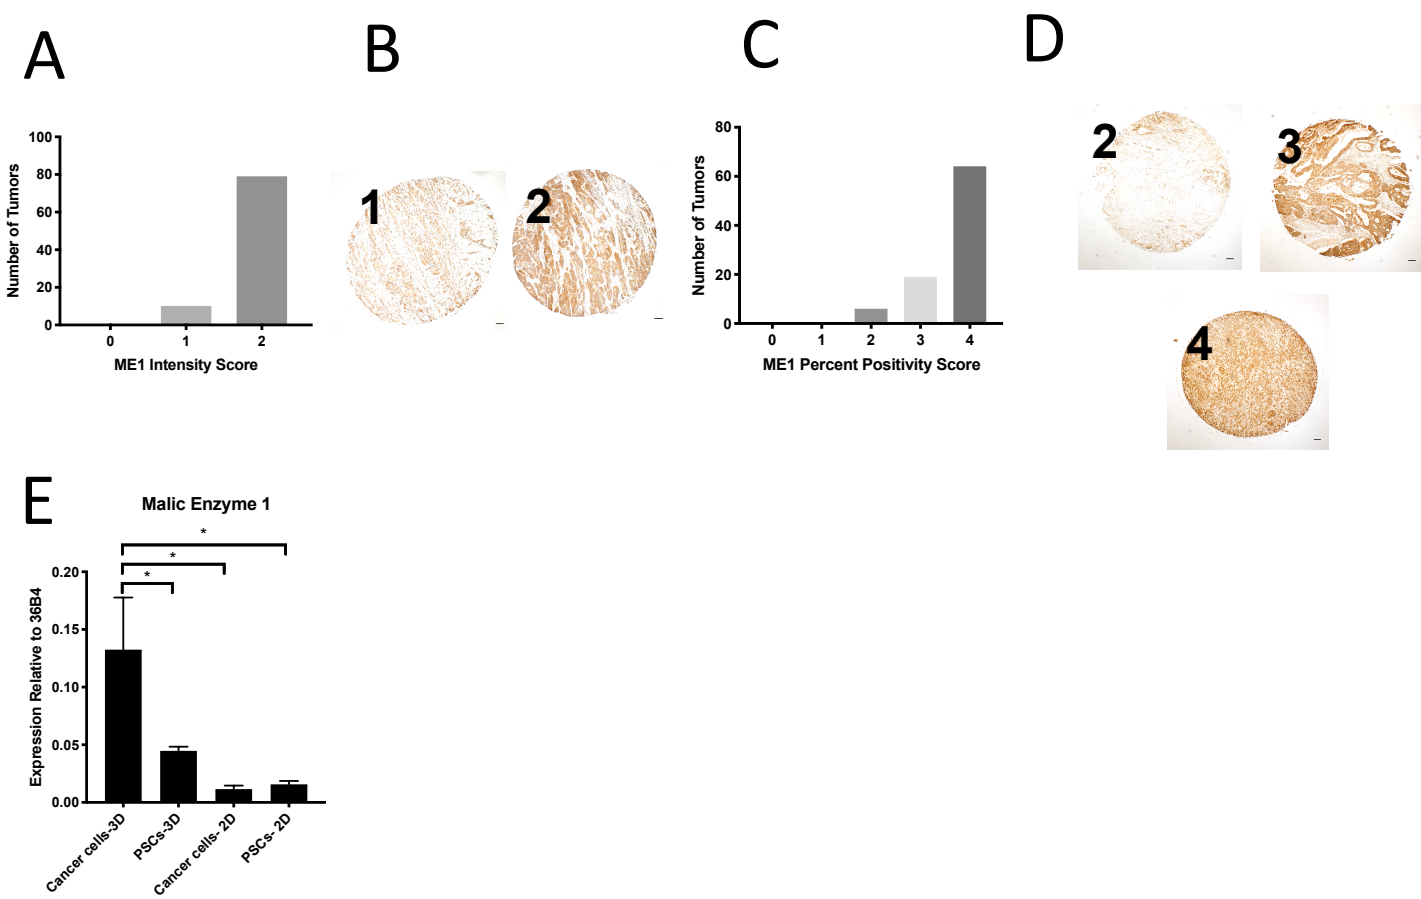

Supplement: supp [file elife-56782-supp-v1.zip › elife_poa_e56782_Figure_7_figure_supplement_2.pdf]
